# Supplementary material for: Four tyrosine residues of the rice immune receptor XA21 are not required for interaction with the co-receptor OsSERK2 or resistance to Xanthomonas oryzae pv. oryzae
Source: PeerJ. 2018 Dec 11;6:e6074. doi: 10.7717/peerj.6074 (PMC6294051; doi:10.7717/peerj.6074)
Supplement: Supplemental Information 7 [file peerj-06-6074-s007.xlsx]

## Sheet: Fig3 top
Line	Lesion Length
Kitaake	14
Kitaake	17
Kitaake	8.5
Kitaake	12.5
Kitaake	11
Kitaake	14.5
Kitaake	14
Kitaake	12
Kitaake	NA
Kitaake	NA
Kitaake	NA
Kitaake	NA
Kitaake	NA
Kitaake	12
Kitaake	16
Kitaake	12.5
Kitaake	15
Kitaake	14.5
Kitaake	16
Kitaake	11.5
Kitaake	9.5
Kitaake	13
Kitaake	NA
Kitaake	NA
Kitaake	NA
Kitaake	NA
Kitaake	15.5
Kitaake	13.5
Kitaake	14
Kitaake	15
Kitaake	14
Kitaake	16
Kitaake	14
Kitaake	15.5
Kitaake	NA
Kitaake	NA
Kitaake	NA
Kitaake	NA
Kitaake	NA
Kitaake	13
Kitaake	12
Kitaake	11
Kitaake	12
Kitaake	13.5
Kitaake	13.5
Kitaake	12
Kitaake	11.5
Kitaake	NA
Kitaake	NA
Kitaake	NA
Kitaake	NA
Kitaake	NA
Kitaake	14
Kitaake	12
Kitaake	9
Kitaake	11
Kitaake	13
Kitaake	11
Kitaake	12.5
Kitaake	NA
Kitaake	NA
Kitaake	NA
Kitaake	NA
Kitaake	NA
Kitaake	NA
Kitaake	13.5
Kitaake	13
Kitaake	14.5
Kitaake	13.5
Kitaake	10
Kitaake	10
Kitaake	11.5
Kitaake	12
Kitaake	NA
Kitaake	NA
Kitaake	NA
Kitaake	NA
Kitaake	NA
Kitaake	10.5
Kitaake	10.5
Kitaake	11.5
Kitaake	12
Kitaake	9.5
Kitaake	10
Kitaake	NA
Kitaake	NA
Kitaake	NA
Kitaake	NA
Kitaake	NA
Kitaake	NA
Kitaake	NA
Kitaake	13
Kitaake	7.5
Kitaake	11.5
Kitaake	12
Kitaake	9.5
Kitaake	10
Kitaake	NA
Kitaake	NA
Kitaake	NA
Kitaake	NA
Kitaake	NA
Kitaake	NA
Kitaake	NA
Kitaake	14.5
Kitaake	13.5
Kitaake	12.5
Kitaake	12.5
Kitaake	14
Kitaake	16.5
Kitaake	14
Kitaake	NA
Kitaake	NA
Kitaake	NA
Kitaake	NA
Kitaake	NA
Kitaake	NA
Ubi::XA21::GFP	1
Ubi::XA21::GFP	3
Ubi::XA21::GFP	2.5
Ubi::XA21::GFP	4
Ubi::XA21::GFP	2.5
Ubi::XA21::GFP	3
Ubi::XA21::GFP	3.5
Ubi::XA21::GFP	NA
Ubi::XA21::GFP	NA
Ubi::XA21::GFP	NA
Ubi::XA21::GFP	NA
Ubi::XA21::GFP	NA
Ubi::XA21::GFP	NA
Ubi::XA21::GFP	2.5
Ubi::XA21::GFP	3
Ubi::XA21::GFP	3
Ubi::XA21::GFP	1
Ubi::XA21::GFP	3
Ubi::XA21::GFP	2
Ubi::XA21::GFP	2.5
Ubi::XA21::GFP	NA
Ubi::XA21::GFP	NA
Ubi::XA21::GFP	NA
Ubi::XA21::GFP	NA
Ubi::XA21::GFP	NA
Ubi::XA21::GFP	NA
Ubi::XA21::GFP	3
Ubi::XA21::GFP	2
Ubi::XA21::GFP	2
Ubi::XA21::GFP	2
Ubi::XA21::GFP	3
Ubi::XA21::GFP	2.5
Ubi::XA21::GFP	2
Ubi::XA21::GFP	1.5
Ubi::XA21::GFP	2
Ubi::XA21::GFP	NA
Ubi::XA21::GFP	NA
Ubi::XA21::GFP	NA
Ubi::XA21::GFP	NA
Ubi::XA21::GFP	4.5
Ubi::XA21::GFP	4
Ubi::XA21::GFP	2.5
Ubi::XA21::GFP	2
Ubi::XA21::GFP	2
Ubi::XA21::GFP	3.5
Ubi::XA21::GFP	3
Ubi::XA21::GFP	3.5
Ubi::XA21::GFP	NA
Ubi::XA21::GFP	NA
Ubi::XA21::GFP	NA
Ubi::XA21::GFP	NA
Ubi::XA21::GFP	NA
Ubi::XA21::GFP	6.5
Ubi::XA21::GFP	2.5
Ubi::XA21::GFP	2
Ubi::XA21::GFP	3
Ubi::XA21::GFP	2
Ubi::XA21::GFP	3.5
Ubi::XA21::GFP	2.5
Ubi::XA21::GFP	2.5
Ubi::XA21::GFP	2.5
Ubi::XA21::GFP	NA
Ubi::XA21::GFP	NA
Ubi::XA21::GFP	NA
Ubi::XA21::GFP	NA
Ubi::XA21::GFP	4
Ubi::XA21::GFP	3.5
Ubi::XA21::GFP	3
Ubi::XA21::GFP	4
Ubi::XA21::GFP	3.5
Ubi::XA21::GFP	3
Ubi::XA21::GFP	2
Ubi::XA21::GFP	3
Ubi::XA21::GFP	3
Ubi::XA21::GFP	NA
Ubi::XA21::GFP	NA
Ubi::XA21::GFP	NA
Ubi::XA21::GFP	NA
Ubi::XA21::GFP	2
Ubi::XA21::GFP	2.5
Ubi::XA21::GFP	3
Ubi::XA21::GFP	2.5
Ubi::XA21::GFP	3
Ubi::XA21::GFP	2.5
Ubi::XA21::GFP	3.5
Ubi::XA21::GFP	2
Ubi::XA21::GFP	2
Ubi::XA21::GFP	NA
Ubi::XA21::GFP	NA
Ubi::XA21::GFP	NA
Ubi::XA21::GFP	NA
Ubi::XA21::GFP	5
Ubi::XA21::GFP	1.5
Ubi::XA21::GFP	2.5
Ubi::XA21::GFP	2
Ubi::XA21::GFP	2
Ubi::XA21::GFP	2
Ubi::XA21::GFP	3
Ubi::XA21::GFP	2
Ubi::XA21::GFP	NA
Ubi::XA21::GFP	NA
Ubi::XA21::GFP	NA
Ubi::XA21::GFP	NA
Ubi::XA21::GFP	NA
Ubi::XA21::GFP	4
Ubi::XA21::GFP	4
Ubi::XA21::GFP	3.5
Ubi::XA21::GFP	3.5
Ubi::XA21::GFP	2.5
Ubi::XA21::GFP	4
Ubi::XA21::GFP	NA
Ubi::XA21::GFP	NA
Ubi::XA21::GFP	NA
Ubi::XA21::GFP	NA
Ubi::XA21::GFP	NA
Ubi::XA21::GFP	NA
Ubi::XA21::GFP	NA
Y698F.1	7
Y698F.1	6
Y698F.1	4.5
Y698F.1	2.5
Y698F.1	3.5
Y698F.1	4
Y698F.1	3
Y698F.1	3.5
Y698F.1	NA
Y698F.1	NA
Y698F.1	NA
Y698F.1	NA
Y698F.1	NA
Y698F.1	6
Y698F.1	4
Y698F.1	2
Y698F.1	5
Y698F.1	4
Y698F.1	3
Y698F.1	3
Y698F.1	5.5
Y698F.1	5
Y698F.1	NA
Y698F.1	NA
Y698F.1	NA
Y698F.1	NA
Y698F.1	3
Y698F.1	2.5
Y698F.1	3.5
Y698F.1	4
Y698F.1	3.5
Y698F.1	3.5
Y698F.1	4
Y698F.1	6
Y698F.1	NA
Y698F.1	NA
Y698F.1	NA
Y698F.1	NA
Y698F.1	NA
Y698F.1	4.5
Y698F.1	6
Y698F.1	4.5
Y698F.1	9.5
Y698F.1	8
Y698F.1	5.5
Y698F.1	3.5
Y698F.1	5
Y698F.1	4.5
Y698F.1	NA
Y698F.1	NA
Y698F.1	NA
Y698F.1	NA
Y698F.1	2.5
Y698F.1	5.5
Y698F.1	4
Y698F.1	2.5
Y698F.1	2
Y698F.1	3
Y698F.1	2
Y698F.1	3
Y698F.1	6
Y698F.1	NA
Y698F.1	NA
Y698F.1	NA
Y698F.1	NA
Y698F.1	5
Y698F.1	7
Y698F.1	7
Y698F.1	7
Y698F.1	6.5
Y698F.1	3.5
Y698F.1	5.5
Y698F.1	5.5
Y698F.1	8
Y698F.1	NA
Y698F.1	NA
Y698F.1	NA
Y698F.1	NA
Y698F.1	4
Y698F.1	5
Y698F.1	8
Y698F.1	7.5
Y698F.1	5.5
Y698F.1	4
Y698F.1	4
Y698F.1	5.5
Y698F.1	NA
Y698F.1	NA
Y698F.1	NA
Y698F.1	NA
Y698F.1	NA
Y698F.1	3.5
Y698F.1	4.5
Y698F.1	4.5
Y698F.1	3.5
Y698F.1	4
Y698F.1	4
Y698F.1	6
Y698F.1	3
Y698F.1	NA
Y698F.1	NA
Y698F.1	NA
Y698F.1	NA
Y698F.1	NA
Y698F.2	1.5
Y698F.2	1
Y698F.2	3.5
Y698F.2	2.5
Y698F.2	1
Y698F.2	1.5
Y698F.2	NA
Y698F.2	NA
Y698F.2	NA
Y698F.2	NA
Y698F.2	NA
Y698F.2	NA
Y698F.2	NA
Y698F.2	2
Y698F.2	1
Y698F.2	3
Y698F.2	2
Y698F.2	1.5
Y698F.2	2
Y698F.2	2.5
Y698F.2	NA
Y698F.2	NA
Y698F.2	NA
Y698F.2	NA
Y698F.2	NA
Y698F.2	NA
Y698F.2	3
Y698F.2	1.5
Y698F.2	1.5
Y698F.2	1
Y698F.2	3
Y698F.2	1
Y698F.2	3
Y698F.2	NA
Y698F.2	NA
Y698F.2	NA
Y698F.2	NA
Y698F.2	NA
Y698F.2	NA
Y698F.2	2.5
Y698F.2	1.5
Y698F.2	1
Y698F.2	1
Y698F.2	1.5
Y698F.2	2
Y698F.2	2
Y698F.2	2
Y698F.2	NA
Y698F.2	NA
Y698F.2	NA
Y698F.2	NA
Y698F.2	NA
Y698F.2	3
Y698F.2	3.5
Y698F.2	2
Y698F.2	1
Y698F.2	2.5
Y698F.2	2.5
Y698F.2	2.5
Y698F.2	NA
Y698F.2	NA
Y698F.2	NA
Y698F.2	NA
Y698F.2	NA
Y698F.2	NA
Y698F.2	2
Y698F.2	3.5
Y698F.2	1.5
Y698F.2	1.5
Y698F.2	2.5
Y698F.2	2
Y698F.2	NA
Y698F.2	NA
Y698F.2	NA
Y698F.2	NA
Y698F.2	NA
Y698F.2	NA
Y698F.2	NA
Y698F.2	2.5
Y698F.2	2.5
Y698F.2	4
Y698F.2	2
Y698F.2	2.5
Y698F.2	3
Y698F.2	3
Y698F.2	NA
Y698F.2	NA
Y698F.2	NA
Y698F.2	NA
Y698F.2	NA
Y698F.2	NA
Y698F.2	1
Y698F.2	1
Y698F.2	1.5
Y698F.2	1.5
Y698F.2	2
Y698F.2	2.5
Y698F.2	NA
Y698F.2	NA
Y698F.2	NA
Y698F.2	NA
Y698F.2	NA
Y698F.2	NA
Y698F.2	NA
Y698D.5	11.5
Y698D.5	13
Y698D.5	15
Y698D.5	9
Y698D.5	13
Y698D.5	12
Y698D.5	8.5
Y698D.5	13
Y698D.5	15.5
Y698D.5	NA
Y698D.5	NA
Y698D.5	NA
Y698D.5	NA
Y698D.5	13.5
Y698D.5	9
Y698D.5	10
Y698D.5	10.5
Y698D.5	10
Y698D.5	12.5
Y698D.5	12
Y698D.5	NA
Y698D.5	NA
Y698D.5	NA
Y698D.5	NA
Y698D.5	NA
Y698D.5	NA
Y698D.5	9
Y698D.5	16
Y698D.5	10
Y698D.5	13.5
Y698D.5	13.5
Y698D.5	9.5
Y698D.5	NA
Y698D.5	NA
Y698D.5	NA
Y698D.5	NA
Y698D.5	NA
Y698D.5	NA
Y698D.5	NA
Y698D.5	11
Y698D.5	10.5
Y698D.5	12
Y698D.5	10.5
Y698D.5	9.5
Y698D.5	14
Y698D.5	14.5
Y698D.5	14.5
Y698D.5	14
Y698D.5	NA
Y698D.5	NA
Y698D.5	NA
Y698D.5	NA
Y698D.5	14
Y698D.5	11.5
Y698D.5	16.5
Y698D.5	13.5
Y698D.5	13.5
Y698D.5	12.5
Y698D.5	12
Y698D.5	13.5
Y698D.5	15.5
Y698D.5	17
Y698D.5	NA
Y698D.5	NA
Y698D.5	NA
Y698D.5	16.5
Y698D.5	14.5
Y698D.5	13.5
Y698D.5	13
Y698D.5	10.5
Y698D.5	8.5
Y698D.5	NA
Y698D.5	NA
Y698D.5	NA
Y698D.5	NA
Y698D.5	NA
Y698D.5	NA
Y698D.5	NA
Y698D.5	11.5
Y698D.5	10
Y698D.5	8.5
Y698D.5	12
Y698D.5	15
Y698D.5	14
Y698D.5	10
Y698D.5	13.5
Y698D.5	NA
Y698D.5	NA
Y698D.5	NA
Y698D.5	NA
Y698D.5	NA
Y698D.5	12
Y698D.5	10
Y698D.5	11
Y698D.5	13.5
Y698D.5	11.5
Y698D.5	8
Y698D.5	16
Y698D.5	NA
Y698D.5	NA
Y698D.5	NA
Y698D.5	NA
Y698D.5	NA
Y698D.5	NA
Y698D.5	12.5
Y698D.5	9
Y698D.5	13.5
Y698D.5	12
Y698D.5	9.5
Y698D.5	10.5
Y698D.5	12.5
Y698D.5	9.5
Y698D.5	11
Y698D.5	11
Y698D.5	NA
Y698D.5	NA
Y698D.5	NA
Y786F.4	2
Y786F.4	3
Y786F.4	2
Y786F.4	2.5
Y786F.4	4.5
Y786F.4	3.5
Y786F.4	NA
Y786F.4	NA
Y786F.4	NA
Y786F.4	NA
Y786F.4	NA
Y786F.4	NA
Y786F.4	NA
Y786F.4	3
Y786F.4	2
Y786F.4	1
Y786F.4	3
Y786F.4	2
Y786F.4	NA
Y786F.4	NA
Y786F.4	NA
Y786F.4	NA
Y786F.4	NA
Y786F.4	NA
Y786F.4	NA
Y786F.4	NA
Y786F.4	2
Y786F.4	2.5
Y786F.4	3
Y786F.4	2.5
Y786F.4	2
Y786F.4	1
Y786F.4	NA
Y786F.4	NA
Y786F.4	NA
Y786F.4	NA
Y786F.4	NA
Y786F.4	NA
Y786F.4	NA
Y786F.4	3
Y786F.4	5
Y786F.4	2.5
Y786F.4	3.5
Y786F.4	3.5
Y786F.4	2
Y786F.4	3
Y786F.4	NA
Y786F.4	NA
Y786F.4	NA
Y786F.4	NA
Y786F.4	NA
Y786F.4	NA
Y786F.4	2
Y786F.4	1.5
Y786F.4	1.5
Y786F.4	1
Y786F.4	1
Y786F.4	NA
Y786F.4	NA
Y786F.4	NA
Y786F.4	NA
Y786F.4	NA
Y786F.4	NA
Y786F.4	NA
Y786F.4	NA
Y786F.4	2
Y786F.4	3
Y786F.4	2.5
Y786F.4	1.5
Y786F.4	1
Y786F.4	3
Y786F.4	NA
Y786F.4	NA
Y786F.4	NA
Y786F.4	NA
Y786F.4	NA
Y786F.4	NA
Y786F.4	NA
Y786F.4	1
Y786F.4	1.5
Y786F.4	2
Y786F.4	1
Y786F.4	2
Y786F.4	NA
Y786F.4	NA
Y786F.4	NA
Y786F.4	NA
Y786F.4	NA
Y786F.4	NA
Y786F.4	NA
Y786F.4	NA
Y786F.5	3
Y786F.5	3.5
Y786F.5	2.5
Y786F.5	2.5
Y786F.5	NA
Y786F.5	NA
Y786F.5	NA
Y786F.5	NA
Y786F.5	NA
Y786F.5	NA
Y786F.5	NA
Y786F.5	NA
Y786F.5	NA
Y786F.5	4.5
Y786F.5	2
Y786F.5	2.5
Y786F.5	3
Y786F.5	NA
Y786F.5	NA
Y786F.5	NA
Y786F.5	NA
Y786F.5	NA
Y786F.5	NA
Y786F.5	NA
Y786F.5	NA
Y786F.5	NA
Y786F.5	1.5
Y786F.5	2
Y786F.5	3
Y786F.5	2
Y786F.5	NA
Y786F.5	NA
Y786F.5	NA
Y786F.5	NA
Y786F.5	NA
Y786F.5	NA
Y786F.5	NA
Y786F.5	NA
Y786F.5	NA
Y786F.5	2
Y786F.5	3
Y786F.5	2
Y786F.5	3.5
Y786F.5	2.5
Y786F.5	2
Y786F.5	NA
Y786F.5	NA
Y786F.5	NA
Y786F.5	NA
Y786F.5	NA
Y786F.5	NA
Y786F.5	NA
Y786F.5	3
Y786F.5	2
Y786F.5	4
Y786F.5	3.5
Y786F.5	NA
Y786F.5	NA
Y786F.5	NA
Y786F.5	NA
Y786F.5	NA
Y786F.5	NA
Y786F.5	NA
Y786F.5	NA
Y786F.5	NA
Y786F.5	4
Y786F.5	2
Y786F.5	1
Y786F.5	4
Y786F.5	2
Y786F.5	3.5
Y786F.5	3
Y786F.5	NA
Y786F.5	NA
Y786F.5	NA
Y786F.5	NA
Y786F.5	NA
Y786F.5	NA
Y786F.5	1
Y786F.5	4
Y786F.5	2.5
Y786F.5	1
Y786F.5	1.5
Y786F.5	2
Y786F.5	2
Y786F.5	6
Y786F.5	NA
Y786F.5	NA
Y786F.5	NA
Y786F.5	NA
Y786F.5	NA
Y786D.1	8
Y786D.1	12.5
Y786D.1	10
Y786D.1	11
Y786D.1	13
Y786D.1	10
Y786D.1	11.5
Y786D.1	7
Y786D.1	10
Y786D.1	NA
Y786D.1	NA
Y786D.1	NA
Y786D.1	NA
Y786D.1	13
Y786D.1	15.5
Y786D.1	16
Y786D.1	14
Y786D.1	11.5
Y786D.1	11
Y786D.1	9
Y786D.1	17.5
Y786D.1	10
Y786D.1	11.5
Y786D.1	NA
Y786D.1	NA
Y786D.1	NA
Y786D.1	14
Y786D.1	9
Y786D.1	14
Y786D.1	13
Y786D.1	NA
Y786D.1	NA
Y786D.1	NA
Y786D.1	NA
Y786D.1	NA
Y786D.1	NA
Y786D.1	NA
Y786D.1	NA
Y786D.1	NA
Y786D.1	10.5
Y786D.1	7.5
Y786D.1	14
Y786D.1	11.5
Y786D.1	12.5
Y786D.1	16
Y786D.1	12.5
Y786D.1	11
Y786D.1	11.5
Y786D.1	NA
Y786D.1	NA
Y786D.1	NA
Y786D.1	NA
Y786D.1	12
Y786D.1	11
Y786D.1	11.5
Y786D.1	11.5
Y786D.1	15.5
Y786D.1	15
Y786D.1	11
Y786D.1	12
Y786D.1	NA
Y786D.1	NA
Y786D.1	NA
Y786D.1	NA
Y786D.1	NA
Y786D.1	16
Y786D.1	15.5
Y786D.1	11
Y786D.1	10
Y786D.1	15.5
Y786D.1	13.5
Y786D.1	13.5
Y786D.1	11
Y786D.1	NA
Y786D.1	NA
Y786D.1	NA
Y786D.1	NA
Y786D.1	NA
Y786D.1	15
Y786D.1	10
Y786D.1	9.5
Y786D.1	12
Y786D.1	12
Y786D.1	16
Y786D.1	12
Y786D.1	12
Y786D.1	NA
Y786D.1	NA
Y786D.1	NA
Y786D.1	NA
Y786D.1	NA
Y786D.1	13
Y786D.1	9.5
Y786D.1	10
Y786D.1	14.5
Y786D.1	9.5
Y786D.1	13.5
Y786D.1	8
Y786D.1	16
Y786D.1	14.5
Y786D.1	13
Y786D.1	NA
Y786D.1	NA
Y786D.1	NA
Y786D.1	11.5
Y786D.1	13
Y786D.1	9
Y786D.1	8
Y786D.1	13
Y786D.1	8.5
Y786D.1	10
Y786D.1	17
Y786D.1	15
Y786D.1	12.5
Y786D.1	NA
Y786D.1	NA
Y786D.1	NA
Y786D.2	11
Y786D.2	11
Y786D.2	10
Y786D.2	9
Y786D.2	9.5
Y786D.2	11.5
Y786D.2	16
Y786D.2	14.5
Y786D.2	13
Y786D.2	NA
Y786D.2	NA
Y786D.2	NA
Y786D.2	NA
Y786D.2	10
Y786D.2	9
Y786D.2	11.5
Y786D.2	10
Y786D.2	14
Y786D.2	13.5
Y786D.2	12
Y786D.2	NA
Y786D.2	NA
Y786D.2	NA
Y786D.2	NA
Y786D.2	NA
Y786D.2	NA
Y786D.2	9.5
Y786D.2	15.5
Y786D.2	11
Y786D.2	13.5
Y786D.2	12
Y786D.2	NA
Y786D.2	NA
Y786D.2	NA
Y786D.2	NA
Y786D.2	NA
Y786D.2	NA
Y786D.2	NA
Y786D.2	NA
Y786D.2	13.5
Y786D.2	11
Y786D.2	9
Y786D.2	9.5
Y786D.2	12
Y786D.2	13.5
Y786D.2	NA
Y786D.2	NA
Y786D.2	NA
Y786D.2	NA
Y786D.2	NA
Y786D.2	NA
Y786D.2	NA
Y786D.2	13
Y786D.2	11.5
Y786D.2	14
Y786D.2	8.5
Y786D.2	10.5
Y786D.2	11.5
Y786D.2	14
Y786D.2	14.5
Y786D.2	15.5
Y786D.2	NA
Y786D.2	NA
Y786D.2	NA
Y786D.2	NA
Y786D.2	6
Y786D.2	10
Y786D.2	13
Y786D.2	9.5
Y786D.2	13.5
Y786D.2	13.5
Y786D.2	NA
Y786D.2	NA
Y786D.2	NA
Y786D.2	NA
Y786D.2	NA
Y786D.2	NA
Y786D.2	NA
Y786D.2	13.5
Y786D.2	12
Y786D.2	12
Y786D.2	8
Y786D.2	12.5
Y786D.2	13
Y786D.2	12.5
Y786D.2	15
Y786D.2	17
Y786D.2	14.5
Y786D.2	NA
Y786D.2	NA
Y786D.2	NA
Y786D.2	11
Y786D.2	16
Y786D.2	8.5
Y786D.2	11.5
Y786D.2	13.5
Y786D.2	11
Y786D.2	12
Y786D.2	12
Y786D.2	8
Y786D.2	NA
Y786D.2	NA
Y786D.2	NA
Y786D.2	NA
Y786D.2	12.5
Y786D.2	11
Y786D.2	16
Y786D.2	9.5
Y786D.2	13
Y786D.2	NA
Y786D.2	NA
Y786D.2	NA
Y786D.2	NA
Y786D.2	NA
Y786D.2	NA
Y786D.2	NA
Y786D.2	NA

## Sheet: Fig3 bot
Line	Lesion Length
kitaake	12.5
kitaake	12
kitaake	14
kitaake	13.5
kitaake	12
kitaake	11.5
kitaake	17
kitaake	NA
kitaake	NA
kitaake	NA
kitaake	NA
kitaake	10
kitaake	14
kitaake	17
kitaake	16
kitaake	15.5
kitaake	13.5
kitaake	18
kitaake	12
kitaake	17
kitaake	14.5
kitaake	NA
kitaake	12.5
kitaake	13.5
kitaake	16
kitaake	17.5
kitaake	14
kitaake	13
kitaake	13
kitaake	13.5
kitaake	NA
kitaake	NA
kitaake	NA
kitaake	14
kitaake	10
kitaake	12.5
kitaake	11.5
kitaake	16.5
kitaake	15
kitaake	13
kitaake	NA
kitaake	NA
kitaake	NA
kitaake	NA
kitaake	14
kitaake	12
kitaake	12
kitaake	13
kitaake	15
kitaake	15.5
kitaake	17
kitaake	12.5
kitaake	12
kitaake	15.5
kitaake	NA
kitaake	14
kitaake	12.5
kitaake	11.5
kitaake	13
kitaake	17
kitaake	12
kitaake	13.5
kitaake	17
kitaake	14
kitaake	NA
kitaake	NA
kitaake	15
kitaake	17.5
kitaake	12
kitaake	19
kitaake	19
kitaake	11
kitaake	15
kitaake	12
kitaake	NA
kitaake	NA
kitaake	NA
kitaake	19
kitaake	12
kitaake	14
kitaake	16.5
kitaake	15.5
kitaake	14
kitaake	12
kitaake	11.5
kitaake	13
kitaake	NA
kitaake	NA
kitaake	15.5
kitaake	15
kitaake	16
kitaake	14.5
kitaake	17.5
kitaake	13
kitaake	17
kitaake	14.5
kitaake	NA
kitaake	NA
kitaake	NA
Ubi..XA21..GFP	1.5
Ubi..XA21..GFP	1.5
Ubi..XA21..GFP	3.5
Ubi..XA21..GFP	2
Ubi..XA21..GFP	3.5
Ubi..XA21..GFP	3.5
Ubi..XA21..GFP	2
Ubi..XA21..GFP	3.5
Ubi..XA21..GFP	2
Ubi..XA21..GFP	1.5
Ubi..XA21..GFP	3
Ubi..XA21..GFP	1.5
Ubi..XA21..GFP	2.5
Ubi..XA21..GFP	2.5
Ubi..XA21..GFP	3
Ubi..XA21..GFP	2.5
Ubi..XA21..GFP	3.5
Ubi..XA21..GFP	2
Ubi..XA21..GFP	2.5
Ubi..XA21..GFP	1.5
Ubi..XA21..GFP	NA
Ubi..XA21..GFP	NA
Ubi..XA21..GFP	2.5
Ubi..XA21..GFP	4
Ubi..XA21..GFP	4
Ubi..XA21..GFP	1.5
Ubi..XA21..GFP	3
Ubi..XA21..GFP	1.5
Ubi..XA21..GFP	2
Ubi..XA21..GFP	3
Ubi..XA21..GFP	3
Ubi..XA21..GFP	2
Ubi..XA21..GFP	NA
Ubi..XA21..GFP	2
Ubi..XA21..GFP	2.5
Ubi..XA21..GFP	3
Ubi..XA21..GFP	2.5
Ubi..XA21..GFP	1.5
Ubi..XA21..GFP	3
Ubi..XA21..GFP	3.5
Ubi..XA21..GFP	2
Ubi..XA21..GFP	1
Ubi..XA21..GFP	NA
Ubi..XA21..GFP	NA
Ubi..XA21..GFP	3.5
Ubi..XA21..GFP	3
Ubi..XA21..GFP	1.5
Ubi..XA21..GFP	2.5
Ubi..XA21..GFP	2
Ubi..XA21..GFP	3
Ubi..XA21..GFP	1
Ubi..XA21..GFP	2
Ubi..XA21..GFP	2
Ubi..XA21..GFP	2
Ubi..XA21..GFP	NA
Ubi..XA21..GFP	3.5
Ubi..XA21..GFP	2
Ubi..XA21..GFP	2.5
Ubi..XA21..GFP	3
Ubi..XA21..GFP	2.5
Ubi..XA21..GFP	1.5
Ubi..XA21..GFP	2
Ubi..XA21..GFP	2
Ubi..XA21..GFP	2.5
Ubi..XA21..GFP	3.5
Ubi..XA21..GFP	NA
Ubi..XA21..GFP	2
Ubi..XA21..GFP	1.5
Ubi..XA21..GFP	1.5
Ubi..XA21..GFP	2
Ubi..XA21..GFP	2.5
Ubi..XA21..GFP	1.5
Ubi..XA21..GFP	2
Ubi..XA21..GFP	2
Ubi..XA21..GFP	3
Ubi..XA21..GFP	NA
Ubi..XA21..GFP	NA
Ubi..XA21..GFP	3
Ubi..XA21..GFP	2.5
Ubi..XA21..GFP	2.5
Ubi..XA21..GFP	3
Ubi..XA21..GFP	1
Ubi..XA21..GFP	2.5
Ubi..XA21..GFP	3
Ubi..XA21..GFP	3.5
Ubi..XA21..GFP	3.5
Ubi..XA21..GFP	NA
Ubi..XA21..GFP	NA
Ubi..XA21..GFP	1
Ubi..XA21..GFP	1.5
Ubi..XA21..GFP	3
Ubi..XA21..GFP	3.5
Ubi..XA21..GFP	3.5
Ubi..XA21..GFP	2
Ubi..XA21..GFP	2
Ubi..XA21..GFP	3
Ubi..XA21..GFP	2
Ubi..XA21..GFP	3
Ubi..XA21..GFP	NA
Y907F.8	3
Y907F.8	3
Y907F.8	3.5
Y907F.8	2.5
Y907F.8	3.5
Y907F.8	3.5
Y907F.8	2
Y907F.8	3
Y907F.8	NA
Y907F.8	NA
Y907F.8	NA
Y907F.8	5.5
Y907F.8	4
Y907F.8	1
Y907F.8	2
Y907F.8	3
Y907F.8	3.5
Y907F.8	3
Y907F.8	3
Y907F.8	NA
Y907F.8	NA
Y907F.8	NA
Y907F.8	3
Y907F.8	5
Y907F.8	2.5
Y907F.8	4
Y907F.8	1.5
Y907F.8	3
Y907F.8	1
Y907F.8	3.5
Y907F.8	NA
Y907F.8	NA
Y907F.8	NA
Y907F.8	4
Y907F.8	2
Y907F.8	1
Y907F.8	4.5
Y907F.8	3
Y907F.8	2
Y907F.8	3
Y907F.8	NA
Y907F.8	NA
Y907F.8	NA
Y907F.8	NA
Y907F.8	3.5
Y907F.8	3
Y907F.8	3
Y907F.8	2
Y907F.8	2
Y907F.8	2.5
Y907F.8	2
Y907F.8	2
Y907F.8	3
Y907F.8	NA
Y907F.8	NA
Y907F.8	2.5
Y907F.8	2.5
Y907F.8	3
Y907F.8	2.5
Y907F.8	3
Y907F.8	1
Y907F.8	3.5
Y907F.8	2.5
Y907F.8	4
Y907F.8	NA
Y907F.8	NA
Y907F.8	4
Y907F.8	2.5
Y907F.8	4
Y907F.8	2.5
Y907F.8	3
Y907F.8	2
Y907F.8	1
Y907F.8	3
Y907F.8	4.5
Y907F.8	NA
Y907F.8	NA
Y907F.14	6
Y907F.14	2
Y907F.14	3.5
Y907F.14	2
Y907F.14	4.5
Y907F.14	3
Y907F.14	2
Y907F.14	3
Y907F.14	3.5
Y907F.14	NA
Y907F.14	NA
Y907F.14	4.5
Y907F.14	2
Y907F.14	4
Y907F.14	3
Y907F.14	3
Y907F.14	2.5
Y907F.14	4
Y907F.14	3.5
Y907F.14	3
Y907F.14	3
Y907F.14	NA
Y907F.14	2.5
Y907F.14	2.5
Y907F.14	4.5
Y907F.14	2
Y907F.14	2.5
Y907F.14	2
Y907F.14	2
Y907F.14	3.5
Y907F.14	2.5
Y907F.14	1.5
Y907F.14	NA
Y907F.14	2.5
Y907F.14	2
Y907F.14	4.5
Y907F.14	2
Y907F.14	2.5
Y907F.14	2
Y907F.14	2
Y907F.14	3.5
Y907F.14	2.5
Y907F.14	NA
Y907F.14	NA
Y907F.14	2
Y907F.14	3
Y907F.14	2.5
Y907F.14	2
Y907F.14	2.5
Y907F.14	4
Y907F.14	3.5
Y907F.14	4
Y907F.14	1
Y907F.14	4
Y907F.14	NA
Y907F.14	3
Y907F.14	3.5
Y907F.14	2
Y907F.14	1.5
Y907F.14	2
Y907F.14	3
Y907F.14	2.5
Y907F.14	NA
Y907F.14	NA
Y907F.14	NA
Y907F.14	NA
Y907F.14	1.5
Y907F.14	3
Y907F.14	2.5
Y907F.14	2
Y907F.14	2
Y907F.14	3
Y907F.14	2.5
Y907F.14	2
Y907F.14	2.5
Y907F.14	3.5
Y907F.14	2
Y907F.14	4
Y907F.14	3.5
Y907F.14	3.5
Y907F.14	2.5
Y907F.14	3.5
Y907F.14	4
Y907F.14	1.5
Y907F.14	2
Y907F.14	2.5
Y907F.14	NA
Y907F.14	NA
Y907D.5	14
Y907D.5	14.5
Y907D.5	15
Y907D.5	12
Y907D.5	16
Y907D.5	9
Y907D.5	NA
Y907D.5	NA
Y907D.5	NA
Y907D.5	NA
Y907D.5	NA
Y907D.5	8.5
Y907D.5	12
Y907D.5	11
Y907D.5	9
Y907D.5	13
Y907D.5	10
Y907D.5	9.5
Y907D.5	15
Y907D.5	NA
Y907D.5	NA
Y907D.5	NA
Y907D.5	17.5
Y907D.5	15
Y907D.5	8
Y907D.5	12
Y907D.5	13.5
Y907D.5	12
Y907D.5	11.5
Y907D.5	14
Y907D.5	19
Y907D.5	13.5
Y907D.5	NA
Y907D.5	12
Y907D.5	16
Y907D.5	15.5
Y907D.5	13
Y907D.5	15.5
Y907D.5	14.5
Y907D.5	14
Y907D.5	10.5
Y907D.5	18
Y907D.5	NA
Y907D.5	NA
Y907D.5	14.5
Y907D.5	12
Y907D.5	18
Y907D.5	13
Y907D.5	14.5
Y907D.5	10
Y907D.5	13.5
Y907D.5	13
Y907D.5	NA
Y907D.5	NA
Y907D.5	NA
Y907D.5	10.5
Y907D.5	16.5
Y907D.5	12.5
Y907D.5	9
Y907D.5	9
Y907D.5	9.5
Y907D.5	10
Y907D.5	NA
Y907D.5	NA
Y907D.5	NA
Y907D.5	NA
Y907D.5	10
Y907D.5	10
Y907D.5	17.5
Y907D.5	11
Y907D.5	17
Y907D.5	13
Y907D.5	11
Y907D.5	10.5
Y907D.5	13
Y907D.5	NA
Y907D.5	NA
Y907D.5	12.5
Y907D.5	15.5
Y907D.5	13
Y907D.5	13.5
Y907D.5	15
Y907D.5	10
Y907D.5	14
Y907D.5	11
Y907D.5	9.5
Y907D.5	14
Y907D.5	NA
Y907D.5	14
Y907D.5	11.5
Y907D.5	13
Y907D.5	15
Y907D.5	11
Y907D.5	16
Y907D.5	13
Y907D.5	12.5
Y907D.5	10
Y907D.5	NA
Y907D.5	NA
Y907D.11	12.5
Y907D.11	13.5
Y907D.11	14
Y907D.11	11
Y907D.11	10.5
Y907D.11	11
Y907D.11	12.5
Y907D.11	14
Y907D.11	13.5
Y907D.11	NA
Y907D.11	NA
Y907D.11	15.5
Y907D.11	13
Y907D.11	17.5
Y907D.11	15.5
Y907D.11	17.5
Y907D.11	11.5
Y907D.11	13.5
Y907D.11	10.5
Y907D.11	NA
Y907D.11	NA
Y907D.11	NA
Y907D.11	14
Y907D.11	12
Y907D.11	13.5
Y907D.11	9.5
Y907D.11	15
Y907D.11	12
Y907D.11	15
Y907D.11	9.5
Y907D.11	12
Y907D.11	NA
Y907D.11	NA
Y907D.11	19
Y907D.11	8.5
Y907D.11	14.5
Y907D.11	10
Y907D.11	19.5
Y907D.11	15
Y907D.11	NA
Y907D.11	NA
Y907D.11	NA
Y907D.11	NA
Y907D.11	NA
Y907D.11	16.5
Y907D.11	21
Y907D.11	13.5
Y907D.11	12
Y907D.11	14.5
Y907D.11	14.5
Y907D.11	9
Y907D.11	11
Y907D.11	NA
Y907D.11	NA
Y907D.11	NA
Y907D.11	13
Y907D.11	11
Y907D.11	15
Y907D.11	10
Y907D.11	11.5
Y907D.11	12
Y907D.11	11.5
Y907D.11	15
Y907D.11	12
Y907D.11	NA
Y907D.11	NA
Y907D.11	14.5
Y907D.11	12
Y907D.11	17
Y907D.11	13
Y907D.11	15
Y907D.11	14.5
Y907D.11	16.5
Y907D.11	13.5
Y907D.11	17
Y907D.11	10
Y907D.11	NA
Y909F.9	2
Y909F.9	2
Y909F.9	2.5
Y909F.9	2
Y909F.9	1.5
Y909F.9	2
Y909F.9	3
Y909F.9	3
Y909F.9	4
Y909F.9	1.5
Y909F.9	NA
Y909F.9	2.5
Y909F.9	2
Y909F.9	2.5
Y909F.9	1.5
Y909F.9	2
Y909F.9	0.5
Y909F.9	3
Y909F.9	2.5
Y909F.9	1.5
Y909F.9	NA
Y909F.9	NA
Y909F.9	3
Y909F.9	2
Y909F.9	3
Y909F.9	1
Y909F.9	3
Y909F.9	1.5
Y909F.9	3.5
Y909F.9	5
Y909F.9	2
Y909F.9	1
Y909F.9	1.5
Y909F.9	1
Y909F.9	3
Y909F.9	2
Y909F.9	3
Y909F.9	4
Y909F.9	2.5
Y909F.9	3.5
Y909F.9	2
Y909F.9	3.5
Y909F.9	3
Y909F.9	NA
Y909F.9	1.5
Y909F.9	4
Y909F.9	2.5
Y909F.9	1.5
Y909F.9	3
Y909F.9	2.5
Y909F.9	2
Y909F.9	2
Y909F.9	2.5
Y909F.9	NA
Y909F.9	NA
Y909F.9	2.5
Y909F.9	2
Y909F.9	2.5
Y909F.9	2
Y909F.9	3.5
Y909F.9	1.5
Y909F.9	2.5
Y909F.9	3.5
Y909F.9	1.5
Y909F.9	2.5
Y909F.9	NA
Y909F.9	2
Y909F.9	2
Y909F.9	1
Y909F.9	1.5
Y909F.9	2.5
Y909F.9	2.5
Y909F.9	2
Y909F.9	2
Y909F.9	3
Y909F.9	3
Y909F.9	NA
Y909F.9	1
Y909F.9	1.5
Y909F.9	3
Y909F.9	1.5
Y909F.9	2.5
Y909F.9	2.5
Y909F.9	NA
Y909F.9	NA
Y909F.9	NA
Y909F.9	NA
Y909F.9	NA
Y909F.11	1.5
Y909F.11	4
Y909F.11	3
Y909F.11	3
Y909F.11	1
Y909F.11	3
Y909F.11	2.5
Y909F.11	1.5
Y909F.11	3
Y909F.11	NA
Y909F.11	NA
Y909F.11	3
Y909F.11	2.5
Y909F.11	3
Y909F.11	3
Y909F.11	3
Y909F.11	3.5
Y909F.11	2
Y909F.11	3
Y909F.11	3.5
Y909F.11	4
Y909F.11	NA
Y909F.11	2
Y909F.11	2.5
Y909F.11	3.5
Y909F.11	2
Y909F.11	3
Y909F.11	2.5
Y909F.11	1.5
Y909F.11	3
Y909F.11	4.5
Y909F.11	NA
Y909F.11	NA
Y909F.11	1.5
Y909F.11	1
Y909F.11	4
Y909F.11	1.5
Y909F.11	3
Y909F.11	3
Y909F.11	2
Y909F.11	1.5
Y909F.11	2
Y909F.11	NA
Y909F.11	NA
Y909F.11	4.5
Y909F.11	2
Y909F.11	2.5
Y909F.11	3.5
Y909F.11	1.5
Y909F.11	2.5
Y909F.11	3
Y909F.11	2
Y909F.11	2
Y909F.11	NA
Y909F.11	NA
Y909F.11	2.5
Y909F.11	2.5
Y909F.11	1.5
Y909F.11	3.5
Y909F.11	2
Y909F.11	2.5
Y909F.11	2
Y909F.11	3.5
Y909F.11	3
Y909F.11	2
Y909F.11	NA
Y909F.11	2.5
Y909F.11	3
Y909F.11	3.5
Y909F.11	3
Y909F.11	1.5
Y909F.11	2
Y909F.11	2
Y909F.11	3
Y909F.11	2
Y909F.11	2.5
Y909F.11	NA
Y909D.11	12.5
Y909D.11	12.5
Y909D.11	13
Y909D.11	9
Y909D.11	13.5
Y909D.11	12
Y909D.11	7
Y909D.11	NA
Y909D.11	NA
Y909D.11	NA
Y909D.11	NA
Y909D.11	6
Y909D.11	8
Y909D.11	10
Y909D.11	12
Y909D.11	9.5
Y909D.11	12.5
Y909D.11	12.5
Y909D.11	9
Y909D.11	11
Y909D.11	8
Y909D.11	NA
Y909D.11	11.5
Y909D.11	13
Y909D.11	8.5
Y909D.11	9.5
Y909D.11	12
Y909D.11	11.5
Y909D.11	13
Y909D.11	8
Y909D.11	10
Y909D.11	15
Y909D.11	NA
Y909D.11	17
Y909D.11	15.5
Y909D.11	11
Y909D.11	14
Y909D.11	16
Y909D.11	11.5
Y909D.11	13.5
Y909D.11	13
Y909D.11	14
Y909D.11	NA
Y909D.11	NA
Y909D.11	13
Y909D.11	19
Y909D.11	18.5
Y909D.11	12
Y909D.11	12.5
Y909D.11	18
Y909D.11	17
Y909D.11	14
Y909D.11	NA
Y909D.11	NA
Y909D.11	NA
Y909D.11	11
Y909D.11	12
Y909D.11	9
Y909D.11	17
Y909D.11	16
Y909D.11	11
Y909D.11	9.5
Y909D.11	NA
Y909D.11	NA
Y909D.11	NA
Y909D.11	NA
Y909D.11	17.5
Y909D.11	10
Y909D.11	13
Y909D.11	10.5
Y909D.11	11.5
Y909D.11	11.5
Y909D.11	10
Y909D.11	9.5
Y909D.11	11.5
Y909D.11	NA
Y909D.11	NA
Y909D.11	12.5
Y909D.11	8
Y909D.11	10.5
Y909D.11	18
Y909D.11	11
Y909D.11	12
Y909D.11	13
Y909D.11	12.5
Y909D.11	16.5
Y909D.11	NA
Y909D.11	NA

## Sheet: Fig5 kit
Time/Pos	0	72	145	218	291	364	437	510	583	656	729	802	875	948	1021	1094	1167	1240	1313	1386	1459	1532	1605	1678	1751	1824	1897	1970	2043	2115	2188	2261	2334	2407	2480	2553	2626	2699	2772	2845	2918	2993	3066	3139	3212	3285	3358	3431	3504
A01	3847	1998	2042	2289	2262	2262	1928	2042	2157	2236	2350	2456	2368	2385	2377	2746	2720	2826	2896	2746	3037	3178	2931	3301	3186	3512	3310	3354	3459	2922	3204	2385	2394	2385	2553	2808	2641	2588	2262	2368	2324	2517	2685	2606	2843	2949	2984	2984	3019
A02	3732	4076	4181	4340	4753	4938	5097	5149	5475	5739	5915	6646	6787	7121	7068	7016	7262	7508	7913	8063	8151	8477	8582	8371	8776	8618	8670	8758	8829	8397	8723	8301	8081	8054	8169	8257	8125	7922	8001	8160	7711	7966	7957	7693	7632	7808	7684	7781	7843
A03	5933	6435	6734	6751	7095	6892	7192	7104	7368	7640	7940	8406	8345	8406	8767	8785	8882	9348	9568	10088	10237	10237	10730	11003	11109	11382	11602	11514	12024	11575	11672	11778	12006	11822	11751	11936	11866	11962	11954	11742	11804	11672	12130	12015	12262	12235	12561	12288	12332
A04	5810	6787	7297	7808	7817	7403	7640	7913	7975	7746	7614	7887	7843	7764	7825	7834	7975	7711	7878	7764	7975	7905	7975	8248	8265	8292	8442	8265	8450	8274	8054	7667	8019	7596	7702	7755	7579	7341	7376	7148	7024	7148	7104	7165	7385	7341	7227	7218	7236
A05	4797	4120	4093	4392	4498	4172	4595	4568	4410	4577	4560	4700	4868	4665	4692	5009	4982	4780	5114	5158	5317	5449	5484	5563	5299	5546	5810	5634	5501	5167	5053	5079	5185	5308	5352	5440	5369	5158	5132	4991	4885	4885	4947	5017	5070	4947	5149	5017	5044
A06	4507	4877	5229	5070	4991	5017	4912	4762	4674	4551	4630	4630	4445	4612	4533	4384	4683	4604	4384	4595	4384	4568	4463	4366	4428	4348	4313	4428	4401	4357	4384	4357	4260	4331	4348	4463	4366	4401	4392	4093	4014	3970	4181	4181	4208	4366	4304	4331	4436
A07	4225	5766	6329	6989	7253	7262	7473	7949	7781	8301	8512	8486	9621	9401	9832	9912	10228	10079	10132	10924	10387	10792	11012	11188	10827	11135	11293	11839	11690	11734	11179	10669	10950	10915	11100	10880	10580	10220	10713	10519	10176	10237	10211	9956	10167	9797	9912	10008	9859
A08	3715	4225	4533	4533	4551	4551	4436	4331	4287	4348	4331	4269	4260	4234	4375	4128	4172	4348	4384	4674	4850	4824	4894	4982	5070	5017	4947	5264	4586	4947	4665	4225	3486	3266	3178	3266	3301	3451	3468	3468	3688	3706	3917	3794	4023	3908	4040	3935	4322
A09	5440	5898	6575	6769	6919	7183	7720	7614	7975	8019	8257	8503	8758	8635	8970	9172	9542	9551	9982	10096	9876	10228	10404	10633	10642	11170	10906	11249	10669	10510	10501	10378	10026	10184	10105	9859	9823	9735	9366	9322	9427	9251	9313	9172	9542	9190	9287	9128	9313
A10	7236	8970	9964	9982	9709	9744	10000	9964	9762	10000	10484	10792	11478	11382	11478	11769	12385	12781	12755	12966	13441	13582	13292	13846	13600	14277	13732	14348	14542	13820	13820	13820	13221	13089	13204	12922	12728	12913	12376	12121	12341	11698	11188	11584	11672	11514	11470	11276	11003
A11	5528	5810	6655	7456	7403	7869	8160	8406	8574	9014	9031	9216	9841	9735	9683	9779	10994	10642	11628	11258	11496	12323	12130	12482	12737	12526	13063	13230	13309	12781	13036	12860	12737	12350	12447	12156	12130	12262	11892	12094	11478	11214	11126	11346	11188	11144	11082	10827	10836
A12	2377	2588	2861	2878	2878	3072	2931	3072	2958	3151	3116	3239	3274	3134	3274	3301	3319	3336	3521	3433	3442	3512	3521	3723	3732	3952	4084	4313	4234	4507	4472	4331	4304	4498	4419	4683	4639	4700	4718	4815	4841	5000	5079	5193	5290	5660	5440	5334	5642
Mean	1	2	3	4	5	6	7	8	9	10	11	12	13	14	15	16	17	18	19	20	21	22	23	24	25	26	27	28	29	30	31	32	33	34	35	36	37	38	39	40	41	42	43	44	45	46	47	48	49
Mock	4830.5	4824	5063.5	5297	5481.75	5373.75	5464.25	5552	5743.75	5840.25	5954.75	6348.75	6335.75	6419	6509.25	6595.25	6709.75	6848.25	7063.75	7165.25	7350	7449.25	7554.5	7730.75	7834	7951	8006	7972.75	8190.5	7792	7913.25	7532.75	7625	7464.25	7543.75	7689	7552.75	7453.25	7398.25	7354.5	7215.75	7325.75	7469	7369.75	7530.5	7583.25	7614	7567.75	7607.5
RaxX21-Y	4311	4747	5046	5246	5323.25	5250.5	5354	5402.5	5288	5444.25	5508.25	5521.25	5798.5	5728	5858	5858.25	6016.25	5952.75	6003.5	6337.75	6234.5	6408.25	6463.25	6524.75	6406	6511.5	6590.75	6791.25	6544.5	6551.25	6320.25	6082.5	5970.25	5955	5994.5	6012.25	5904	5807.5	5926.25	5767.75	5690.75	5699.5	5814	5737	5867	5754.5	5851.25	5822.75	5915.25
RaxX21-sY	5145.25	5816.5	6513.75	6771.25	6727.25	6967	7202.75	7264	7317.25	7546	7722	7937.5	8337.75	8221.5	8351.25	8505.25	9060	9077.5	9471.5	9438.25	9563.75	9911.25	9836.75	10171	10177.8	10481.2	10446.2	10785	10688.5	10404.5	10457.2	10347.2	10072	10030.2	10043.8	9905	9830	9902.5	9588	9588	9521.75	9290.75	9176.5	9323.75	9423	9377	9319.75	9141.25	9198.5
se
602.004	1117.83	1214.06	1237.71	1256.78	1165.33	1302.53	1305.93	1308.74	1286.85	1280.95	1349.08	1361.85	1370.01	1420.57	1333.02	1370.6	1402.58	1444.12	1560.89	1526.68	1507.73	1650.58	1607.48	1668.4	1633.95	1722.76	1697.43	1769.13	1794.12	1755.49	1939.28	1977.37	1939.8	1893.51	1875.01	1894.24	1919.89	1989.55	1932.33	1942.15	1880.95	1936.12	1923.93	1923.35	1897.9	1959.26	1903.05	1905.45	1941.02
230.439	378.69	487.421	599.076	652.67	692.406	713.228	853.395	834.912	953.625	1003.28	992.751	1280.5	1228.09	1326.25	1363.86	1413.84	1378.27	1386.88	1533.81	1397.21	1472.92	1530.62	1573.51	1485.15	1560.53	1597.15	1701.38	1731.94	1736.03	1625.38	1540.31	1695.85	1705.1	1758.85	1682.37	1614.83	1511.71	1631.48	1614.29	1516.28	1533.45	1481.85	1429.3	1451.37	1364.17	1374.09	1412.87	1324.1	1397.14
1011.1	1303.02	1451.16	1470.12	1420.12	1406.62	1507.1	1480.13	1499.78	1519.78	1603.22	1637.54	1778.09	1787.29	1772.74	1821.25	1999.74	2027.98	2063.59	2086.71	2166.79	2242.43	2187.24	2247.9	2236.53	2267.42	2204.79	2250.46	2298.14	2083.77	2117.06	2132.49	2047.16	1944.36	1987.55	1858.33	1840.18	1864.68	1752.32	1721.15	1675.65	1524.96	1433.38	1479.99	1451.12	1339.78	1377.88	1350.75	1244.97	1190.82
[truncated: 100 more columns]

## Sheet: Fig5 XA21
Time/Pos	0	72	145	218	291	364	437	510	583	656	729	802	875	948	1021	1094	1167	1240	1313	1386	1459	1532	1605	1678	1751	1824	1897	1970	2043	2115	2188	2261	2334	2407	2480	2553	2626	2699	2772	2845	2918	2993	3066	3139	3212	3285	3358	3431	3504
B01	2060	1919	2042	2271	2412	3046	2914	3222	3530	3926	4049	4375	4692	4762	4824	5229	5413	5854	5810	6391	5906	6118	6637	7042	7227	7324	7614	7729	8345	7773	7949	8450	8204	8618	8380	8662	8820	8706	8829	8741	8785	9445	9154	9225	9331	9771	9841	10044	9947
B02	889	1382	1444	1532	1576	1611	1708	1849	1884	1875	2095	1963	2341	2738	2517	2773	3090	3389	3151	3591	3459	3503	3723	3838	4208	3864	4260	4146	4331	4524	4419	4463	4489	4463	4480	4304	4577	4436	4445	4480	4436	4551	4577	4595	4630	4824	4762	4753	4683
B03	3134	2685	2702	2588	2614	2544	2641	2614	2729	2614	2667	2790	2870	3098	3195	3274	3415	3503	3415	3653	3671	3803	4049	3979	4164	4128	4296	4410	4498	4577	4348	4436	4489	4357	4366	4401	4252	4252	4322	4014	4392	4498	4560	4472	4560	4560	4604	4771	4797
B04	810	827	942	880	933	951	942	1065	1144	1118	1171	1285	1338	1444	1250	1338	1540	1593	1628	1857	1787	1919	2139	2280	2236	2262	2245	2597	2491	2500	2579	2685	2201	2262	2438	2623	2473	2650	2473	2297	2218	2333	1954	2007	2148	2192	2227	2341	2394
B05	467	546	519	475	546	528	519	563	590	502	528	555	572	607	625	704	783	766	792	880	898	907	898	1021	1056	1127	1012	1136	1285	1100	1320	1171	1329	1250	1356	1382	1338	1470	1408	1320	1400	1338	1514	1505	1611	1708	1602	1681	1628
B06	907	1039	1056	1153	1479	1426	1611	1752	1963	2104	2130	2544	2896	3046	3389	3706	3961	4076	4410	4780	4982	4877	5105	5493	5053	6259	5968	5950	6373	6144	6399	6408	6611	6347	6655	6751	6813	6769	6751	6831	6655	6778	6787	6989	6822	6751	6804	6795	6734
B07	1259	1373	1435	1347	1435	1303	1276	1329	1373	1356	1391	1444	1532	1505	1734	1893	1981	1893	2095	2016	2394	2438	2447	2394	2482	2720	2500	2535	2720	2606	2623	2729	2843	2702	2799	2834	2975	2799	2852	3169	3054	3028	3178	3081	2940	2993	2852	2878	2949
B08	4049	4709	4973	4912	4903	4524	4533	4912	5000	4718	5114	5281	5810	5854	6109	6663	6927	6892	7121	7500	7552	6276	8177	8221	8459	8873	8926	8512	8890	8591	8697	8221	8318	8318	8538	8230	8195	8195	7993	8151	8151	7438	7896	7464	7491	7931	7552	7852	7544
B09	563	651	722	757	836	783	739	1109	1268	1760	2799	4753	6963	9912	11637	14277	18379	19189	18415	19400	18828	19330	19048	17719	17033	17191	18899	18203	18776	20501	21170	21795	23485	24092	23916	26442	26161	27375	29409	29541	30157	32983	33088	35060	35967	37146	37912	39400	36592
B10	3679	4287	4824	5079	5334	5255	5396	5519	7209	10211	16135	22103	29127	33608	41028	45438	46415	52524	55024	53466	53219	52057	49936	47612	45015	42119	41398	41838	42023	41098	43017	43396	46459	47286	48290	48352	51441	51996	54311	54918	57136	59363	59953	60957	61027	62893	64988	66731	67479
B11	4551	4841	5202	5466	5440	5440	5616	6399	8318	11566	16689	21865	27419	32463	34417	39945	40385	45825	47797	47454	47163	46406	43484	42392	39892	37648	36433	35130	36935	38211	38889	39752	39989	41785	41811	43317	46142	46265	47269	48941	48334	51151	52277	52621	53395	54830	56661	56767	57207
B12	5308	6126	6760	7060	7253	7288	7667	8987	12376	19198	29189	38616	44091	55050	65323	67453	72241	73509	76854	72708	70120	66238	63298	58245	57022	57224	55191	55587	54170	58835	56362	59680	62268	62312	63932	65393	69645	70182	66423	74354	74301	77039	79248	79882	80119	79301	81669	84177	82655
Mean
Mock	1723.25	1703.25	1782.5	1817.75	1883.75	2038	2051.25	2187.5	2321.75	2383.25	2495.5	2603.25	2810.25	3010.5	2946.5	3153.5	3364.5	3584.75	3501	3873	3705.75	3835.75	4137	4284.75	4458.75	4394.5	4603.75	4720.5	4916.25	4843.5	4823.75	5008.5	4845.75	4925	4916	4997.5	5030.5	5011	5017.25	4883	4957.75	5206.75	5061.25	5074.75	5167.25	5336.75	5358.5	5477.25	5455.25
RaxX21-Y	1670.5	1916.75	1995.75	1971.75	2090.75	1945.25	1984.75	2139	2231.5	2170	2290.75	2456	2702.5	2753	2964.25	3241.5	3413	3406.75	3604.5	3794	3956.5	3624.5	4156.75	4282.25	4262.5	4744.75	4601.5	4533.25	4817	4610.25	4759.75	4632.25	4775.25	4654.25	4837	4799.25	4830.25	4808.25	4751	4867.75	4815	4645.5	4843.75	4759.75	4716	4845.75	4702.5	4801.5	4713.75
RaxX21-sY	3525.25	3976.25	4377	4590.5	4715.75	4691.5	4854.5	5503.5	7292.75	10683.8	16203	21834.2	26900	32758.2	38101.2	41778.2	44355	47761.8	49522.5	48257	47332.5	46007.8	43941.5	41492	39740.5	38545.5	37980.2	37689.5	37976	39661.2	39859.5	41155.8	43050.2	43868.8	44487.2	45876	48347.2	48954.5	49353	51938.5	52482	55134	56141.5	57130	57627	58542.5	60307.5	61768.8	60983.2
se
550.274	395.958	380.114	382.944	388.474	468.686	450.962	467.857	516.756	598.087	602.597	665.938	703.104	683.349	744.387	804.313	795.982	873.764	864.557	936.861	845.813	865.755	931.895	996.432	1030.92	1059.95	1111.99	1079.61	1230.03	1089.61	1125.32	1220.24	1242.55	1331.22	1246.07	1287.88	1345.14	1295.31	1348.25	1368.98	1376.78	1504.26	1496.98	1506.35	1503.05	1592.12	1602.71	1625.69	1596.26	1660.22
809.215	946.12	1010.05	997.747	961.737	882.263	879.584	956.52	964.721	910.196	996.386	1025.76	1140.29	1149.81	1192.18	1296.78	1342.14	1349.69	1390.54	1482.1	1465.58	1203.88	1596.98	1611.96	1625	1744.59	1776.45	1667.63	1729.23	1696.51	1697.71	1623.65	1620.99	1625.03	1665.17	1610.36	1604.44	1594.15	1562.38	1583.94	1561.99	1469.17	1498.73	1463.28	1441.38	1484	1459.83	1492.12	1435.5	1442.9
1041.99	1173.42	1288.35	1347.82	1366.16	1381.3	1464.03	1639.32	2294.83	3572.2	5389.37	6912.97	7628.04	9218.11	11043.5	10925	11077	11201.8	12069	11024.1	10671.1	9822.24	9266.89	8583.33	8377.17	8258.71	7496.55	7766.41	7350.44	7847.06	7260.29	7772.69	8026.58	7891.41	8280.99	8017.03	8945.47	8816.49	7735.59	9228.42	9189.4	9148.06	9551.77	9308.22	9149.3	8762.78	9097.05	9363.64	9665.46	9162.83
[truncated: 100 more columns]

## Sheet: Fig5 698D
Time/Pos	0	72	145	218	291	364	437	510	583	656	729	802	875	948	1021	1094	1167	1240	1313	1386	1459	1532	1605	1678	1751	1824	1897	1970	2043	2115	2188	2261	2334	2407	2480	2553	2626	2699	2772	2845	2918	2993	3066	3139	3212	3285	3358	3431	3504
C01	1188	1215	1312	1444	1479	1558	1602	1602	1637	1752	1628	1831	1849	1928	1981	2042	2095	2139	2271	2280	2438	2623	2606	2465	2711	2333	2060	2042	1919	1910	2042	1998	2042	2121	2333	2333	2500	2421	2667	2843	2817	2870	3037	3063	3195	3195	3310	3380	3644
C02	467	519	555	555	599	651	643	731	669	669	590	775	898	731	1047	845	977	924	1083	1188	1259	1285	1056	1241	1435	1241	1347	1356	1514	1584	1576	1681	1813	1752	1804	1769	1796	1901	2130	1963	1989	2218	2394	2614	2368	2473	2447	2764	2782
C03	572	713	801	766	810	854	986	986	1065	1030	871	1197	1294	1250	1373	1180	1320	1391	1444	1496	1760	1488	1338	1558	1787	1584	1813	1620	1769	1919	1945	1981	2025	1928	2042	1919	1866	2227	2157	2157	2077	2421	2561	2694	2245	2447	2359	2561	2676
C04	1338	1259	1285	1100	1224	1127	1144	1118	1012	915	801	1003	1030	995	1136	1003	1074	1118	1268	1206	1426	1197	1153	1408	1417	1391	1576	1373	1426	1672	1708	1646	1690	1681	1813	1611	1488	2060	1937	1849	1875	2077	2086	2280	2227	2412	2060	2350	2315
C05	1056	1180	1206	1136	1312	1329	1268	1338	1584	1444	1444	1637	1831	1787	1769	1769	1928	1822	1972	2113	2297	2095	2042	2394	2447	2403	2553	2465	2465	2641	2746	2764	2799	2808	2826	2667	2650	3186	3002	2905	3028	3195	2949	3336	3345	3635	3160	3556	3442
C06	396	352	379	379	458	379	440	423	528	475	467	502	599	581	563	528	599	581	616	607	766	660	669	775	739	836	845	792	757	880	907	959	1003	889	977	880	995	1118	1100	1056	986	1241	1109	1224	1127	1171	1030	1224	1188
C07	185	141	158	176	158	141	167	141	167	158	167	167	211	202	167	202	202	202	194	211	229	238	202	229	220	220	211	202	176	211	176	211	202	185	202	202	246	229	229	185	202	255	202	220	220	255	194	246	202
C08	7896	7693	7570	7808	8221	7438	8010	7570	8010	8512	7570	7975	8600	8072	7579	7861	8107	7896	7940	8697	8433	7746	7693	7905	7746	7984	8195	7456	7456	7755	7596	7473	7737	7288	7394	7324	8098	7579	8019	7394	7447	7975	7464	7165	7579	7834	7500	7412	6963
C09	202	194	211	194	238	220	211	255	246	273	255	229	264	273	246	264	317	273	290	334	308	308	308	334	326	308	352	326	317	379	370	334	379	387	326	361	396	379	396	379	317	414	379	387	379	396	405	396	405
C10	1338	1400	1593	1813	1893	1928	1937	1998	2236	2588	2561	2429	2738	2588	2570	2870	3072	2773	3160	3459	3310	3380	3468	3354	3627	3468	3644	3424	3468	3477	3345	3424	3512	3468	3283	3451	3697	3415	3521	3627	3442	3767	3961	3415	3521	3547	3662	3882	3891
C11	555	563	713	775	845	819	889	907	1030	1171	1241	1197	1373	1329	1391	1505	1496	1540	1796	1954	1813	1972	2095	2016	2157	2262	2183	2253	2447	2570	2544	2658	2764	2949	3028	3151	3248	3336	3459	3512	3547	3820	3741	3741	3697	3935	3917	4111	4067
C12	643	678	695	775	792	1003	933	1136	1162	1285	1347	1452	1488	1813	2139	1963	1981	1945	2306	2500	2429	2456	2632	2878	2852	2931	3010	3081	3266	3433	3776	3547	3319	3591	3891	4146	4568	4357	4621	4956	4982	5246	4877	4947	5449	5484	5343	5801	5845
Mean
Mock	891.25	926.5	988.25	966.25	1028	1047.5	1093.75	1109.25	1095.75	1091.5	972.5	1201.5	1267.75	1226	1384.25	1267.5	1366.5	1393	1516.5	1542.5	1720.75	1648.25	1538.25	1668	1837.5	1637.25	1699	1597.75	1657	1771.25	1817.75	1826.5	1892.5	1870.5	1998	1908	1912.5	2152.25	2222.75	2203	2189.5	2396.5	2519.5	2662.75	2508.75	2631.75	2544	2763.75	2854.25
RaxX21-Y	2383.25	2341.5	2328.25	2374.75	2537.25	2321.75	2471.25	2368	2572.25	2647.25	2412	2570.25	2810.25	2660.5	2519.5	2590	2709	2625.25	2680.5	2907	2931.25	2684.75	2651.5	2825.75	2788	2860.75	2951	2728.75	2713.5	2871.75	2856.25	2851.75	2935.25	2792.5	2849.75	2768.25	2997.25	3028	3087.5	2885	2915.75	3166.5	2931	2986.25	3067.75	3223.75	2971	3109.5	2948.75
RaxX21-sY	684.5	708.75	803	889.25	942	992.5	992.5	1074	1168.5	1329.25	1351	1326.75	1465.75	1500.75	1586.5	1650.5	1716.5	1632.75	1888	2061.75	1965	2029	2125.75	2145.5	2240.5	2242.25	2297.25	2271	2374.5	2464.75	2508.75	2490.75	2493.5	2598.75	2632	2777.25	2977.25	2871.75	2999.25	3118.5	3072	3311.75	3239.5	3122.5	3261.5	3340.5	3331.75	3547.5	3552
se
217.86	183.809	186.11	194.799	198.616	196.126	199.087	182.835	200.63	232.684	226.514	226.862	210.511	256.867	210.476	267.079	253.335	266.475	262.075	255.762	260.781	330.58	360.691	273.441	303.367	242.308	153.392	159.898	113.651	84.6536	106.837	94.4427	85.2609	98.323	124.506	154.994	212.346	111.599	155.975	222.604	213.214	172.903	198.578	160.741	230.885	188.165	268.428	222.122	281.586	194.512
1846.92	1797.87	1761.75	1822.82	1910.29	1724.61	1861.03	1752.72	1837.34	1973.96	1740.81	1828.83	1960.57	1835.21	1720.56	1789.13	1836.79	1790.65	1793.72	1973	1885.51	1733.26	1725.27	1754.37	1719.76	1768.48	1816.61	1647.02	1653.78	1706.51	1669.85	1630.94	1690.16	1597.71	1611.64	1605.1	1772.87	1638.57	1742.8	1606.41	1623.61	1715.3	1615.43	1536.82	1640.74	1694.37	1633.68	1593.36	1500.07	1605.58
237.761	252.485	287.855	336.996	345.438	353.804	355.56	360.124	409.246	476.718	472.355	452.082	505.958	484.465	508.895	542.248	571.151	520.832	602.41	654.542	631.999	643.727	668.524	664.287	705.254	690.323	714.073	693.353	720.479	725.924	757.228	745.328	722.442	750.259	789.691	831.934	902.99	862.671	907.863	970.167	983.22	1024.85	984.714	969.53	1054.79	1066.96	1043.33	1134.3	1138.04	1085.47
[truncated: 100 more columns]

## Sheet: Fig5 786D
Time/Pos	0	72	145	218	291	364	437	510	583	656	729	802	875	948	1021	1094	1167	1240	1313	1386	1459	1532	1605	1678	1751	1824	1897	1970	2043	2115	2188	2261	2334	2407	2480	2553	2626	2699	2772	2845	2918	2993	3066	3139	3212	3285	3358	3431	3504
E01	3081	3301	3662	3407	3697	3767	3627	3882	3820	4031	4269	4322	4428	4674	4885	5017	5061	5158	5325	5413	5704	5959	5968	6188	6038	6294	6241	6443	6734	6628	6655	6804	6734	6866	7174	7130	7473	7640	7570	7614	7623	7764	7711	7764	7834	7834	7834	8010	8010
E02	1505	1637	1620	1514	1611	1620	1320	1514	1391	1444	1558	1514	1593	1672	1893	1937	1963	1937	1849	1928	2165	2201	2253	2359	2306	2157	2359	2447	2042	2403	2394	2306	2447	2658	2949	2694	3028	2896	2799	3134	2931	3151	3239	3098	3116	3019	3530	3204	3336
E03	766	898	1003	959	1083	1074	1074	1215	1294	1232	1356	1338	1593	1488	1637	1787	1796	1787	1813	2121	2069	2262	1945	2025	2183	2104	2350	2227	2245	2394	2359	2473	2623	2632	2870	2799	3019	2922	2966	3116	2984	2975	2984	2702	2738	2694	2931	3098	3072
E04	2289	2271	2148	1787	1866	1681	1716	1743	2104	2033	2121	1954	2368	1981	2165	2148	2394	2341	2385	2729	2597	3134	2526	2517	2931	2632	2843	2676	2650	2878	3186	3081	3230	3081	3257	3002	3477	3503	3495	3442	3477	3732	3591	3512	3618	3838	3864	4384	4331
E05	581	581	669	625	704	643	616	722	827	827	819	871	1021	942	889	977	1091	1056	1153	1091	1153	1329	1056	1030	1285	1206	1329	1197	1268	1426	1488	1488	1655	1488	1743	1470	1514	1690	1708	1716	1743	2016	1813	1866	2025	2218	2007	2544	2429
E06	282	264	273	299	290	246	282	352	334	370	343	343	370	387	387	361	440	414	449	502	458	546	502	431	546	572	625	537	590	722	687	651	695	731	819	678	845	819	871	836	871	942	907	951	959	1127	959	1268	1241
E07	2359	2236	2253	2113	2236	2007	1919	2174	2253	2262	2297	2280	2491	2421	2553	2561	2650	2834	2870	3063	3142	3169	3301	3283	3468	3547	3591	3688	3811	3987	3908	4031	4058	4287	4260	4436	4489	4480	4683	4665	4736	4938	4912	4824	5176	5220	5061	5554	5528
E08	2289	1998	2033	2209	2139	2174	2069	2271	2174	2209	2201	2104	2377	2341	2077	2403	2509	2676	2694	2940	2852	2817	3019	2834	3107	3319	3169	2984	3310	3319	3310	3424	3292	3618	3433	3539	3565	3644	3688	3715	3600	3591	3741	3706	4040	4093	3891	4472	4366
E09	2966	2931	3248	3098	3134	3222	3204	3451	3495	3310	3574	3688	3908	3838	4384	4269	4269	4665	4736	4929	5123	4780	5343	5546	5493	5695	5713	5845	5924	6267	5915	6232	6531	6857	6787	7368	7420	7420	7887	7720	7702	8169	7966	8081	8160	7975	7913	9040	8459
E10	1206	1171	1241	1224	1294	1312	1259	1320	1197	1259	1215	1347	1320	1364	1558	1373	1320	1444	1505	1576	1725	1725	1743	1831	1752	1849	1866	1787	2007	2121	2113	2121	2033	2306	2368	2465	2500	2720	2694	2447	2729	2694	2641	2694	2553	2183	2121	2130	1945
E11	1056	1294	1400	1576	1655	1620	1734	1998	1998	2104	2060	2271	2385	2517	2658	2711	2588	2764	2755	3178	3433	3380	3345	3635	3503	3521	3750	3750	3838	4111	4128	4313	4049	4190	4304	4384	4789	4656	4973	4789	4894	5264	5141	5167	5484	5572	5660	5616	5519
E12	4304	4480	4868	5642	5035	5017	5343	5678	6021	6751	6531	6443	6778	7297	7262	7773	6980	7711	7473	8353	9146	8204	8301	9471	8239	6567	8309	7341	7482	8204	8195	8133	8063	8380	7632	7051	8820	8811	8838	8714	8591	10088	9366	9859	9665	9885	9788	9014	9797
Mean
Mock	1910.25	2026.75	2108.25	1916.75	2064.25	2035.5	1934.25	2088.5	2152.25	2185	2326	2282	2495.5	2453.75	2645	2722.25	2803.5	2805.75	2843	3047.75	3133.75	3389	3173	3272.25	3364.5	3296.75	3448.25	3448.25	3417.75	3575.75	3648.5	3666	3758.5	3809.25	4062.5	3906.25	4249.25	4240.25	4207.5	4326.5	4253.75	4405.5	4381.25	4269	4326.5	4346.25	4539.75	4674	4687.25
RaxX21-Y	1377.75	1269.75	1307	1311.5	1342.25	1267.5	1221.5	1379.75	1397	1417	1415	1399.5	1564.75	1522.75	1476.5	1575.5	1672.5	1745	1791.5	1899	1901.25	1965.25	1969.5	1894.5	2101.5	2161	2178.5	2101.5	2244.75	2363.5	2348.25	2398.5	2425	2531	2563.75	2530.75	2603.25	2658.25	2737.5	2733	2737.5	2871.75	2843.25	2836.75	3050	3164.5	2979.5	3459.5	3391
RaxX21-sY	2383	2469	2689.25	2885	2779.5	2792.75	2885	3111.75	3177.75	3356	3345	3437.25	3597.75	3754	3965.5	4031.5	3789.25	4146	4117.25	4509	4856.75	4522.25	4683	5120.75	4746.75	4408	4909.5	4680.75	4812.75	5175.75	5087.75	5199.75	5169	5433.25	5272.75	5317	5882.25	5901.75	6098	5917.5	5979	6553.75	6278.5	6450.25	6465.5	6403.75	6370.5	6450	6430
se
498.969	509.031	568.308	525.767	568.145	593.077	579.538	607.527	584.509	638.234	667.583	692.227	669.566	747.039	754.407	768.492	762.971	792.762	837.607	806.676	864.41	882.77	939.194	977.312	906.085	1006.11	938.012	1002.45	1112.62	1023.68	1020.19	1059.17	1005.91	1024.1	1040.52	1076.48	1079.89	1141.88	1130.61	1098.38	1129.79	1131.12	1116.87	1176.68	1182.98	1187.23	1114.91	1149.55	1140.27	1201.81
549.902	495.807	491.443	495.341	495.664	483.224	452.222	492.787	482.298	481.802	491.606	471.443	519.678	508.559	504.283	539.226	541.02	598.537	590.738	648.27	651.04	618.707	698.95	689.189	705.018	747.156	713.633	739.458	778.895	770.398	755.952	795.795	763.991	846.215	782.658	875.805	854.348	847.094	877.122	881.752	876.107	877.637	908.119	875.746	954.065	918.988	921.577	959.726	960.266	950.477
773.326	781.185	857.26	1004.94	850.694	851.445	917.978	963.999	1060.66	1207.38	1168.73	1111.56	1185.65	1284.59	1243.24	1380.42	1223.08	1359.82	1301.39	1452.78	1589.12	1376.92	1413.02	1636.44	1392.48	1066.65	1378.69	1213.55	1196.6	1317.39	1294.53	1288.88	1332.89	1355.11	1198.44	1162.53	1403.27	1367.61	1401.22	1425.58	1339.5	1624.32	1497.38	1582.06	1564.69	1660.68	1648.78	1649.25	1741.62	1781.87
[truncated: 100 more columns]

## Sheet: Fig5 907D
Time/Pos	0	72	145	218	291	364	437	510	583	656	729	802	875	948	1021	1094	1167	1240	1313	1386	1459	1532	1605	1678	1751	1824	1897	1970	2043	2115	2188	2261	2334	2407	2480	2553	2626	2699	2772	2845	2918	2993	3066	3139	3212	3285	3358	3431	3504
C01	1188	1215	1312	1444	1479	1558	1602	1602	1637	1752	1628	1831	1849	1928	1981	2042	2095	2139	2271	2280	2438	2623	2606	2465	2711	2333	2060	2042	1919	1910	2042	1998	2042	2121	2333	2333	2500	2421	2667	2843	2817	2870	3037	3063	3195	3195	3310	3380	3644
C02	467	519	555	555	599	651	643	731	669	669	590	775	898	731	1047	845	977	924	1083	1188	1259	1285	1056	1241	1435	1241	1347	1356	1514	1584	1576	1681	1813	1752	1804	1769	1796	1901	2130	1963	1989	2218	2394	2614	2368	2473	2447	2764	2782
C03	572	713	801	766	810	854	986	986	1065	1030	871	1197	1294	1250	1373	1180	1320	1391	1444	1496	1760	1488	1338	1558	1787	1584	1813	1620	1769	1919	1945	1981	2025	1928	2042	1919	1866	2227	2157	2157	2077	2421	2561	2694	2245	2447	2359	2561	2676
C04	1338	1259	1285	1100	1224	1127	1144	1118	1012	915	801	1003	1030	995	1136	1003	1074	1118	1268	1206	1426	1197	1153	1408	1417	1391	1576	1373	1426	1672	1708	1646	1690	1681	1813	1611	1488	2060	1937	1849	1875	2077	2086	2280	2227	2412	2060	2350	2315
C05	1056	1180	1206	1136	1312	1329	1268	1338	1584	1444	1444	1637	1831	1787	1769	1769	1928	1822	1972	2113	2297	2095	2042	2394	2447	2403	2553	2465	2465	2641	2746	2764	2799	2808	2826	2667	2650	3186	3002	2905	3028	3195	2949	3336	3345	3635	3160	3556	3442
C06	396	352	379	379	458	379	440	423	528	475	467	502	599	581	563	528	599	581	616	607	766	660	669	775	739	836	845	792	757	880	907	959	1003	889	977	880	995	1118	1100	1056	986	1241	1109	1224	1127	1171	1030	1224	1188
C07	185	141	158	176	158	141	167	141	167	158	167	167	211	202	167	202	202	202	194	211	229	238	202	229	220	220	211	202	176	211	176	211	202	185	202	202	246	229	229	185	202	255	202	220	220	255	194	246	202
C08	7896	7693	7570	7808	8221	7438	8010	7570	8010	8512	7570	7975	8600	8072	7579	7861	8107	7896	7940	8697	8433	7746	7693	7905	7746	7984	8195	7456	7456	7755	7596	7473	7737	7288	7394	7324	8098	7579	8019	7394	7447	7975	7464	7165	7579	7834	7500	7412	6963
C09	202	194	211	194	238	220	211	255	246	273	255	229	264	273	246	264	317	273	290	334	308	308	308	334	326	308	352	326	317	379	370	334	379	387	326	361	396	379	396	379	317	414	379	387	379	396	405	396	405
C10	1338	1400	1593	1813	1893	1928	1937	1998	2236	2588	2561	2429	2738	2588	2570	2870	3072	2773	3160	3459	3310	3380	3468	3354	3627	3468	3644	3424	3468	3477	3345	3424	3512	3468	3283	3451	3697	3415	3521	3627	3442	3767	3961	3415	3521	3547	3662	3882	3891
C11	555	563	713	775	845	819	889	907	1030	1171	1241	1197	1373	1329	1391	1505	1496	1540	1796	1954	1813	1972	2095	2016	2157	2262	2183	2253	2447	2570	2544	2658	2764	2949	3028	3151	3248	3336	3459	3512	3547	3820	3741	3741	3697	3935	3917	4111	4067
C12	643	678	695	775	792	1003	933	1136	1162	1285	1347	1452	1488	1813	2139	1963	1981	1945	2306	2500	2429	2456	2632	2878	2852	2931	3010	3081	3266	3433	3776	3547	3319	3591	3891	4146	4568	4357	4621	4956	4982	5246	4877	4947	5449	5484	5343	5801	5845
Mean
Mock	891.25	926.5	988.25	966.25	1028	1047.5	1093.75	1109.25	1095.75	1091.5	972.5	1201.5	1267.75	1226	1384.25	1267.5	1366.5	1393	1516.5	1542.5	1720.75	1648.25	1538.25	1668	1837.5	1637.25	1699	1597.75	1657	1771.25	1817.75	1826.5	1892.5	1870.5	1998	1908	1912.5	2152.25	2222.75	2203	2189.5	2396.5	2519.5	2662.75	2508.75	2631.75	2544	2763.75	2854.25
RaxX21-Y	2383.25	2341.5	2328.25	2374.75	2537.25	2321.75	2471.25	2368	2572.25	2647.25	2412	2570.25	2810.25	2660.5	2519.5	2590	2709	2625.25	2680.5	2907	2931.25	2684.75	2651.5	2825.75	2788	2860.75	2951	2728.75	2713.5	2871.75	2856.25	2851.75	2935.25	2792.5	2849.75	2768.25	2997.25	3028	3087.5	2885	2915.75	3166.5	2931	2986.25	3067.75	3223.75	2971	3109.5	2948.75
RaxX21-sY	684.5	708.75	803	889.25	942	992.5	992.5	1074	1168.5	1329.25	1351	1326.75	1465.75	1500.75	1586.5	1650.5	1716.5	1632.75	1888	2061.75	1965	2029	2125.75	2145.5	2240.5	2242.25	2297.25	2271	2374.5	2464.75	2508.75	2490.75	2493.5	2598.75	2632	2777.25	2977.25	2871.75	2999.25	3118.5	3072	3311.75	3239.5	3122.5	3261.5	3340.5	3331.75	3547.5	3552
se
217.86	183.809	186.11	194.799	198.616	196.126	199.087	182.835	200.63	232.684	226.514	226.862	210.511	256.867	210.476	267.079	253.335	266.475	262.075	255.762	260.781	330.58	360.691	273.441	303.367	242.308	153.392	159.898	113.651	84.6536	106.837	94.4427	85.2609	98.323	124.506	154.994	212.346	111.599	155.975	222.604	213.214	172.903	198.578	160.741	230.885	188.165	268.428	222.122	281.586	194.512
1846.92	1797.87	1761.75	1822.82	1910.29	1724.61	1861.03	1752.72	1837.34	1973.96	1740.81	1828.83	1960.57	1835.21	1720.56	1789.13	1836.79	1790.65	1793.72	1973	1885.51	1733.26	1725.27	1754.37	1719.76	1768.48	1816.61	1647.02	1653.78	1706.51	1669.85	1630.94	1690.16	1597.71	1611.64	1605.1	1772.87	1638.57	1742.8	1606.41	1623.61	1715.3	1615.43	1536.82	1640.74	1694.37	1633.68	1593.36	1500.07	1605.58
237.761	252.485	287.855	336.996	345.438	353.804	355.56	360.124	409.246	476.718	472.355	452.082	505.958	484.465	508.895	542.248	571.151	520.832	602.41	654.542	631.999	643.727	668.524	664.287	705.254	690.323	714.073	693.353	720.479	725.924	757.228	745.328	722.442	750.259	789.691	831.934	902.99	862.671	907.863	970.167	983.22	1024.85	984.714	969.53	1054.79	1066.96	1043.33	1134.3	1138.04	1085.47
[truncated: 100 more columns]

## Sheet: Fig5 909D
Time/Pos	0	72	145	218	291	364	437	510	583	656	729	802	875	948	1021	1094	1167	1240	1313	1386	1459	1532	1605	1678	1751	1824	1897	1970	2043	2115	2188	2261	2334	2407	2480	2553	2626	2699	2772	2845	2918	2993	3066	3139	3212	3285	3358	3431	3504
D01	1021	1012	1065	968	1074	924	977	924	951	951	977	959	1039	1136	1197	1232	1444	1435	1769	1831	2007	2033	2289	2491	2632	2852	3142	3010	3283	3301	3283	3354	3591	3785	3952	3864	3996	4366	4172	4120	4401	4357	4533	4648	4824	4973	4753	4991	5061
D02	3679	3635	2966	3125	3292	3521	3512	3723	3767	3829	3785	3679	3785	3882	4040	3759	3864	3688	3715	4058	3855	3741	3908	3882	3891	3732	3706	3521	3512	3345	3310	3301	3274	3160	3230	3116	3213	3142	3222	3222	3195	3090	2870	2966	2641	2711	2764	2949	2940
D03	2808	3090	2852	3266	3072	3539	3644	4084	3970	4366	4859	5299	4929	5413	5220	5449	5510	5537	5766	5942	5572	5704	5625	5590	5994	5871	5739	6162	5739	5827	5634	5792	5950	6065	5519	5546	5686	5537	5343	5378	5317	5281	5369	5273	5273	5088	5185	5220	4815
D04	1910	1804	1796	2227	2403	2711	2826	3186	3591	4084	4111	4973	5255	5378	5686	5898	6311	6206	6795	6866	6883	7042	7024	7341	7684	7931	7746	7376	7042	7165	6989	7306	7359	7500	7306	7227	7288	7209	7236	7165	7007	7016	7130	7086	7068	6804	7016	6989	6919
D05	1972	2033	1998	2174	2306	2403	2544	2817	2843	3160	3098	3424	3336	3547	3759	4023	3741	4102	4040	4181	4304	4524	4498	4771	4560	4577	4700	4665	4674	4683	4674	4410	4639	4586	4568	4454	4542	4480	4419	4287	4410	4384	4304	4401	4260	4190	4269	4322	4120
D06	1180	1047	1153	1100	1109	1091	1153	1285	1338	1382	1347	1540	1637	1849	1672	1937	2095	2060	2069	2227	2148	2324	2218	2262	2526	2306	2482	2465	2570	2385	2544	2553	2421	2025	2095	2095	2227	2192	2113	2245	2060	2113	2086	2086	2051	2253	2324	2245	2245
D07	2060	2042	2183	2509	2597	2614	2887	3345	3081	3389	3820	3644	3882	3961	4216	4243	4401	4498	4841	4833	4903	5290	5088	5281	5334	5141	5431	5220	5449	5325	5185	5220	5193	5264	5229	5070	5229	5026	5105	4973	3996	4789	5009	4824	4692	4744	4727	4744	4560
D08	3917	4102	4674	4885	5369	5449	6347	6505	6707	7764	8318	9190	9207	9181	10044	10528	11883	11971	11734	12719	12807	13556	13873	13697	14454	13829	14594	14902	14665	14630	14823	14445	15325	14410	14894	14990	14858	14313	14647	14233	13952	13917	14207	13837	13723	13978	13512	13133	13160
D09	1373	1611	1628	1496	1875	1849	1699	2025	1937	2069	2165	2060	2148	2297	2262	2350	2561	2702	2746	2773	2878	3028	2940	3125	3151	3371	3354	3380	3495	3609	3618	3635	3600	3750	3530	3697	3679	3644	3600	3301	3283	3327	3169	3186	3354	3204	3125	3389	3398
D10	5097	6074	6919	7429	7949	8662	8908	8917	10079	11258	12024	13441	13520	14207	14938	16223	16883	17262	18080	18177	19277	18283	19048	19797	20166	20554	20932	20474	20950	21020	20897	20386	20307	19770	19559	19665	18063	18353	18476	17975	18001	17869	17737	17438	16997	16460	16196	16355	15880
D11	97	79	88	114	88	79	88	88	88	88	79	97	106	97	106	150	114	114	167	150	150	158	132	150	158	185	150	211	202	202	211	220	211	220	229	229	264	255	308	290	326	334	396	326	370	405	449	484	528
D12	3363	3803	4128	4445	4586	4789	4938	5211	5651	6021	6769	7376	7878	8283	8714	9454	9797	10008	10246	10774	10889	11214	11443	11716	11822	11936	11839	12323	12033	12359	12033	12693	11989	15598	13133	12121	12059	11505	11355	11364	10580	10792	10783	10334	9929	10017	9885	9753	9656
Mean
Mock	2354.5	2385.25	2169.75	2396.5	2460.25	2673.75	2739.75	2979.25	3069.75	3307.5	3433	3727.5	3752	3952.25	4035.75	4084.5	4282.25	4216.5	4511.25	4674.25	4579.25	4630	4711.5	4826	5050.25	5096.5	5083.25	5017.25	4894	4909.5	4804	4938.25	5043.5	5127.5	5001.75	4938.25	5045.75	5063.5	4993.25	4971.25	4980	4936	4975.5	4993.25	4951.5	4894	4929.5	5037.25	4933.75
RaxX21-Y	2282.25	2306	2502	2667	2845.25	2889.25	3232.75	3488	3492.25	3923.75	4145.75	4449.5	4515.5	4634.5	4922.75	5182.75	5530	5657.75	5671	5990	6040.5	6423.5	6419.25	6502.75	6718.5	6463.25	6801.75	6813	6839.5	6755.75	6806.5	6657	6894.5	6571.25	6696.5	6652.25	6714	6502.75	6571	6434.5	6104.5	6300.75	6401.5	6287	6181.5	6291.25	6208	6111	6021.25
RaxX21-sY	2482.5	2891.75	3190.75	3371	3624.5	3844.75	3908.25	4060.25	4438.75	4859	5259.25	5743.5	5913	6221	6505	7044.25	7338.75	7521.5	7809.75	7968.5	8298.5	8170.75	8390.75	8697	8824.25	9011.5	9068.75	9097	9170	9297.5	9189.75	9233.5	9026.75	9834.5	9112.75	8928	8516.25	8439.25	8434.75	8232.5	8047.5	8080.5	8021.25	7821	7662.5	7521.5	7413.75	7495.25	7365.5
se
572.696	597.37	452.736	528.842	499.251	614.377	614.327	709.485	710.482	793.118	848.97	986.907	957.679	1004.27	1007.65	1056.46	1074.47	1069.19	1115.94	1113.36	1058.06	1099.47	1028.6	1050.88	1118.75	1137.76	1048.23	1046.5	905.224	955.86	913.263	980.033	975.712	1007.51	904.534	916.622	908.229	866.316	864.293	854.522	803.314	826.054	886.268	850.823	910.018	839.517	872.702	826.925	813.764	781.988
579.728	642.581	757.912	798.072	900.754	917.343	1103.7	1096.44	1138.93	1356.38	1484.49	1649.19	1635.25	1582.88	1794.63	1855.95	2172.46	2171.14	2103.24	2310.32	2331.78	2459.19	2560.47	2487.18	2645.61	2530.53	2672.01	2761.17	2678.46	2699.55	2732.67	2655.34	2873.27	2704.39	2814.5	2852.23	2789.57	2674.8	2767	2663.27	2665.49	2606.14	2675.32	2587.6	2579.5	2617.3	2489.76	2403.53	2431.94	2530.68
1100.47	1307.32	1495.76	1626.46	1712.54	1876.64	1947.93	1932.9	2207.37	2463.8	2652.84	2991.21	3022.47	3174.5	3353.42	3647.18	3787.7	3863.92	4035.95	4084.59	4311.01	4104.58	4289.63	4438.68	4517.66	4578.07	4660.23	4577.92	4651.13	4671.52	4626.07	4554.6	4501.72	4667.19	4428.83	4363.81	4033.09	4058.51	4069.95	4001.31	3956.09	3934.58	3912.71	3834.71	3697	3598.72	3537.14	3530.95	3418.52	3290.23
[truncated: 100 more columns]

## Sheet: Fig5B
Well	Fluor	Gene	Content	Sample	Cq	Cq Mean	Cq Std. Dev	mean	var		Sample Key	Line
A01	SYBR	04g10010	Unkn	3	33.61	33.61	0				1	Mock	Kitaake
A02	SYBR	04g10010	Unkn	3	33.99	33.99	0				2		XA21-GFP
A03	SYBR	04g10010	Unkn	3	33.16	33.16	0	33.5867	0.172633		3		698D5-14
C01	SYBR	04g10010	Unkn	4	35.46	35.46	0				4		786D1-2
C02	SYBR	04g10010	Unkn	4	33.22	33.22	0				5		907D4-2
C03	SYBR	04g10010	Unkn	4	33.17	33.17	0	33.95	1.7107		6		909D11-4
E01	SYBR	04g10010	Unkn	5	34.14	34.14	0				7	RaxX21-Y	Kitaake
E02	SYBR	04g10010	Unkn	5	34.53	34.53	0				8		XA21-GFP
E03	SYBR	04g10010	Unkn	5	32.5	32.5	0	33.7233	1.16043		9		698D5-14
G01	SYBR	04g10010	Unkn	6	32.51	32.51	0				10		786D1-2
G02	SYBR	04g10010	Unkn	6	32.4	32.4	0				11		907D4-2
G03	SYBR	04g10010	Unkn	6	32.08	32.08	0	32.33	0.0499		12		909D11-4
A04	SYBR	04g10010	Unkn	1	32.82	32.82	0				13	RaxX21-sY	Kitaake
A05	SYBR	04g10010	Unkn	1	33.86	33.86	0				14		XA21-GFP
A06	SYBR	04g10010	Unkn	1	33.28	33.28	0	33.32	0.2716		15		698D5-14
B04	SYBR	04g10010	Unkn	2	31.25	31.25	0				16		786D1-2
B05	SYBR	04g10010	Unkn	2	31.13	31.13	0				17		907D4-2
B06	SYBR	04g10010	Unkn	2	32.06	32.06	0	31.48	0.2559		18		909D11-4
C04	SYBR	04g10010	Unkn	9	33.14	33.14	0
C05	SYBR	04g10010	Unkn	9	34.93	34.93	0
C06	SYBR	04g10010	Unkn	9	34.15	34.15	0	34.0733	0.805433
E04	SYBR	04g10010	Unkn	10	32.45	32.45	0
E05	SYBR	04g10010	Unkn	10	32.61	32.61	0
E06	SYBR	04g10010	Unkn	10	32.52	32.52	0	32.5267	0.00643333
G04	SYBR	04g10010	Unkn	11	33.37	33.37	0
G05	SYBR	04g10010	Unkn	11	34.35	34.35	0
G06	SYBR	04g10010	Unkn	11	33	33	0	33.5733	0.486633
A07	SYBR	04g10010	Unkn	12	33.46	33.46	0
A08	SYBR	04g10010	Unkn	12	32.97	32.97	0
A09	SYBR	04g10010	Unkn	12	32.21	32.21	0	32.88	0.3967
C07	SYBR	04g10010	Unkn	7	32.24	32.24	0
C08	SYBR	04g10010	Unkn	7	33.29	33.29	0
C09	SYBR	04g10010	Unkn	7	34.28	34.28	0	33.27	1.0407
D07	SYBR	04g10010	Unkn	8	28.03	28.03	0
D08	SYBR	04g10010	Unkn	8	28.06	28.06	0
D09	SYBR	04g10010	Unkn	8	28.03	28.03	0	28.04	0.0003
E07	SYBR	04g10010	Unkn	15	31.93	31.93	0
E08	SYBR	04g10010	Unkn	15	31.13	31.13	0
E09	SYBR	04g10010	Unkn	15	31.26	31.26	0	31.44	0.1843
G07	SYBR	04g10010	Unkn	16	30.7	30.7	0
G08	SYBR	04g10010	Unkn	16	31.15	31.15	0
G09	SYBR	04g10010	Unkn	16	30.49	30.49	0	30.78	0.1137
A10	SYBR	04g10010	Unkn	17	34.57	34.57	0
A11	SYBR	04g10010	Unkn	17	33.18	33.18	0
A12	SYBR	04g10010	Unkn	17	32.31	32.31	0	33.3533	1.29943
C10	SYBR	04g10010	Unkn	18	32.25	32.25	0
C11	SYBR	04g10010	Unkn	18	32.92	32.92	0
C12	SYBR	04g10010	Unkn	18	32.98	32.98	0	32.7167	0.164233
E10	SYBR	04g10010	Unkn	13	32.89	32.89	0
E11	SYBR	04g10010	Unkn	13	32.55	32.55	0
E12	SYBR	04g10010	Unkn	13	32.23	32.23	0	32.5567	0.108933
F10	SYBR	04g10010	Unkn	14	23.1	23.1	0
F11	SYBR	04g10010	Unkn	14	22.91	22.91	0
F12	SYBR	04g10010	Unkn	14	22.9	22.9	0	22.97	0.0127
G10	SYBR	04g10010	Neg Ctrl	water	N/A	0	0
G11	SYBR	04g10010	Neg Ctrl	water	N/A	0	0
G12	SYBR	04g10010	Neg Ctrl	water	N/A	0	0	#DIV/0!	#DIV/0!
H10	SYBR	04g10010	Neg Ctrl		N/A	0	0
H11	SYBR	04g10010	Neg Ctrl		N/A	0	0
H12	SYBR	04g10010	Neg Ctrl		N/A	0	0	#DIV/0!	#DIV/0!
H01	SYBR	pr10	Unkn	3	30.14	30.14	0
H02	SYBR	pr10	Unkn	3	29.99	29.99	0
H03	SYBR	pr10	Unkn	3	30.04	30.04	0	30.0567	0.00583333
F01	SYBR	pr10	Unkn	4	30.15	30.15	0
F02	SYBR	pr10	Unkn	4	30.2	30.2	0
F03	SYBR	pr10	Unkn	4	29.86	29.86	0	30.07	0.0337
D01	SYBR	pr10	Unkn	5	29.72	29.72	0
D02	SYBR	pr10	Unkn	5	29.89	29.89	0
D03	SYBR	pr10	Unkn	5	29.92	29.92	0	29.8433	0.0116333
B01	SYBR	pr10	Unkn	6	30.52	30.52	0
B02	SYBR	pr10	Unkn	6	30.67	30.67	0
B03	SYBR	pr10	Unkn	6	30.79	30.79	0	30.66	0.0183
A04	SYBR	pr10	Unkn	1	29.42	29.42	0
A05	SYBR	pr10	Unkn	1	29.19	29.19	0
A06	SYBR	pr10	Unkn	1	29.68	29.68	0	29.43	0.0601
B04	SYBR	pr10	Unkn	2	28.24	28.24	0
B05	SYBR	pr10	Unkn	2	29.18	29.18	0
B06	SYBR	pr10	Unkn	2	28.74	28.74	0	28.72	0.2212
C04	SYBR	pr10	Unkn	9	30.84	30.84	0
C05	SYBR	pr10	Unkn	9	30.59	30.59	0
C06	SYBR	pr10	Unkn	9	30.76	30.76	0	30.73	0.0163
E04	SYBR	pr10	Unkn	10	31.43	31.43	0
E05	SYBR	pr10	Unkn	10	30.89	30.89	0
E06	SYBR	pr10	Unkn	10	31.1	31.1	0	31.14	0.0741
G04	SYBR	pr10	Unkn	11	28.76	28.76	0
G05	SYBR	pr10	Unkn	11	28.52	28.52	0
G06	SYBR	pr10	Unkn	11	28.55	28.55	0	28.61	0.0171
A07	SYBR	pr10	Unkn	12	29.63	29.63	0
A08	SYBR	pr10	Unkn	12	29.95	29.95	0
A09	SYBR	pr10	Unkn	12	30.2	30.2	0	29.9267	0.0816333
C07	SYBR	pr10	Unkn	7	28.6	28.6	0
C08	SYBR	pr10	Unkn	7	28.64	28.64	0
C09	SYBR	pr10	Unkn	7	28.67	28.67	0	28.6367	0.00123333
D07	SYBR	pr10	Unkn	8	26.55	26.55	0
D08	SYBR	pr10	Unkn	8	26.51	26.51	0
D09	SYBR	pr10	Unkn	8	26.89	26.89	0	26.65	0.0436
E07	SYBR	pr10	Unkn	15	29.09	29.09	0
E08	SYBR	pr10	Unkn	15	29.22	29.22	0
E09	SYBR	pr10	Unkn	15	29.56	29.56	0	29.29	0.0589
G07	SYBR	pr10	Unkn	16	30.28	30.28	0
G08	SYBR	pr10	Unkn	16	30.78	30.78	0
G09	SYBR	pr10	Unkn	16	30.89	30.89	0	30.65	0.1057
A10	SYBR	pr10	Unkn	17	28.63	28.63	0
A11	SYBR	pr10	Unkn	17	28.29	28.29	0
A12	SYBR	pr10	Unkn	17	28.05	28.05	0	28.3233	0.0849333
C10	SYBR	pr10	Unkn	18	31.56	31.56	0
C11	SYBR	pr10	Unkn	18	31.08	31.08	0
C12	SYBR	pr10	Unkn	18	30.31	30.31	0	30.9833	0.397633
E10	SYBR	pr10	Unkn	13	29.61	29.61	0
E11	SYBR	pr10	Unkn	13	29.31	29.31	0
E12	SYBR	pr10	Unkn	13	29.32	29.32	0	29.4133	0.0290333
F10	SYBR	pr10	Unkn	14	22.3	22.3	0
F11	SYBR	pr10	Unkn	14	22.11	22.11	0
F12	SYBR	pr10	Unkn	14	22.11	22.11	0	22.1733	0.0120333
G10	SYBR	pr10	Neg Ctrl	water	N/A	0	0
G11	SYBR	pr10	Neg Ctrl	water	N/A	0	0
G12	SYBR	pr10	Neg Ctrl	water	N/A	0	0	#DIV/0!	#DIV/0!
H10	SYBR	pr10	Neg Ctrl		17.55	17.55	0
H11	SYBR	pr10	Neg Ctrl		N/A	0	0
H12	SYBR	pr10	Neg Ctrl		N/A	0	0	17.55	#DIV/0!
Well	Fluor	Target	Content	Sample	Cq	Cq Mean	Cq Std. Dev
Well	Fluor	Target	Content	Sample	Cq	Cq Mean	Cq Std. Dev
Well	Fluor	Target	Content	Sample	Cq	Cq Mean	Cq Std. Dev	#DIV/0!	#DIV/0!
A01	SYBR	ubq	Unkn	3	22.85	22.85	0
A02	SYBR	ubq	Unkn	3	22.8	22.8	0
A03	SYBR	ubq	Unkn	3	23.07	23.07	0	22.9067	0.0206333
C01	SYBR	ubq	Unkn	4	21	21	0
C02	SYBR	ubq	Unkn	4	20.82	20.82	0
C03	SYBR	ubq	Unkn	4	20.95	20.95	0	20.9233	0.00863333
E01	SYBR	ubq	Unkn	5	22.18	22.18	0
E02	SYBR	ubq	Unkn	5	22.29	22.29	0
E03	SYBR	ubq	Unkn	5	22.23	22.23	0	22.2333	0.00303333
G01	SYBR	ubq	Unkn	6	22.38	22.38	0
G02	SYBR	ubq	Unkn	6	22.27	22.27	0
G03	SYBR	ubq	Unkn	6	22.18	22.18	0	22.2767	0.0100333
A04	SYBR	ubq	Unkn	1	22.64	22.64	0
A05	SYBR	ubq	Unkn	1	22.57	22.57	0
A06	SYBR	ubq	Unkn	1	22.52	22.52	0	22.5767	0.00363333
B04	SYBR	ubq	Unkn	2	22.31	22.31	0
B05	SYBR	ubq	Unkn	2	22.25	22.25	0
B06	SYBR	ubq	Unkn	2	22.35	22.35	0	22.3033	0.00253333
C04	SYBR	ubq	Unkn	9	22.23	22.23	0
C05	SYBR	ubq	Unkn	9	22.13	22.13	0
C06	SYBR	ubq	Unkn	9	22.12	22.12	0	22.16	0.0037
E04	SYBR	ubq	Unkn	10	22.4	22.4	0
E05	SYBR	ubq	Unkn	10	22.3	22.3	0
E06	SYBR	ubq	Unkn	10	22.21	22.21	0	22.3033	0.00903333
G04	SYBR	ubq	Unkn	11	21.11	21.11	0
G05	SYBR	ubq	Unkn	11	21.09	21.09	0
G06	SYBR	ubq	Unkn	11	21.12	21.12	0	21.1067	0.000233333
A07	SYBR	ubq	Unkn	12	21.14	21.14	0
A08	SYBR	ubq	Unkn	12	21.13	21.13	0
A09	SYBR	ubq	Unkn	12	21.12	21.12	0	21.13	0.0001
C07	SYBR	ubq	Unkn	7	21.26	21.26	0
C08	SYBR	ubq	Unkn	7	20.67	20.67	0
C09	SYBR	ubq	Unkn	7	20.76	20.76	0	20.8967	0.101033
D07	SYBR	ubq	Unkn	8	21.67	21.67	0
D08	SYBR	ubq	Unkn	8	21.69	21.69	0
D09	SYBR	ubq	Unkn	8	21.81	21.81	0	21.7233	0.00573333
E07	SYBR	ubq	Unkn	15	21.8	21.8	0
E08	SYBR	ubq	Unkn	15	21.89	21.89	0
E09	SYBR	ubq	Unkn	15	22.01	22.01	0	21.9	0.0111
G07	SYBR	ubq	Unkn	16	21.82	21.82	0
G08	SYBR	ubq	Unkn	16	21.82	21.82	0
G09	SYBR	ubq	Unkn	16	21.69	21.69	0	21.7767	0.00563333
A10	SYBR	ubq	Unkn	17	21.07	21.07	0
A11	SYBR	ubq	Unkn	17	21.01	21.01	0
A12	SYBR	ubq	Unkn	17	20.94	20.94	0	21.0067	0.00423333
C10	SYBR	ubq	Unkn	18	21.5	21.5	0
C11	SYBR	ubq	Unkn	18	21.25	21.25	0
C12	SYBR	ubq	Unkn	18	21.25	21.25	0	21.3333	0.0208333
E10	SYBR	ubq	Unkn	13	22.03	22.03	0
E11	SYBR	ubq	Unkn	13	21.91	21.91	0
E12	SYBR	ubq	Unkn	13	22.02	22.02	0	21.9867	0.00443333
F10	SYBR	ubq	Unkn	14	21.87	21.87	0
F11	SYBR	ubq	Unkn	14	21.66	21.66	0
F12	SYBR	ubq	Unkn	14	21.63	21.63	0	21.72	0.0171
G10	SYBR	ubq	Neg Ctrl	water	N/A	0	0
G11	SYBR	ubq	Neg Ctrl	water	N/A	0	0
G12	SYBR	ubq	Neg Ctrl	water	N/A	0	0	#DIV/0!	#DIV/0!
H10	SYBR	ubq	Neg Ctrl		4.93	4.93	0
H11	SYBR	ubq	Neg Ctrl		N/A	0	0
H12	SYBR	ubq	Neg Ctrl		N/A	0	0	4.93	#DIV/0!

## Sheet: Fig6 Kit
Time/Pos	0	72	145	218	291	364	437	510	583	656	729	802	875	948	1021	1094	1167	1240	1313	1386	1459	1532	1605	1678	1751	1824	1897	1970	2043	2115	2188	2261	2334	2407	2480	2553	2626	2699	2772	2845	2918	2993	3066	3139	3212	3285	3358	3431	3504
B01	986	871	880	933	1056	1056	1206	1285	1593	1602	1593	1664	1901	1822	1796	1893	1796	2060	2077	2350	2297	2139	2218	2157	2297	2324	2438	2456	2456	2570	2403	2253	2561	2394	2368	2394	2429	2509	2517	2535	2526	2738	2509	2702	2720	2535	2782	2764	2887
B02	889	792	836	845	924	951	933	986	1021	1012	1065	995	1171	1232	1215	1259	1276	1285	1338	1523	1391	1329	1452	1373	1417	1523	1540	1532	1435	1496	1567	1549	1602	1646	1540	1620	1584	1690	1681	1576	1602	1734	1593	1725	1725	1655	1690	1769	1849
B03	819	704	722	634	660	695	713	660	757	660	739	607	651	651	678	731	678	695	739	766	757	731	748	819	801	854	836	863	898	942	863	898	951	907	951	977	942	1021	933	1030	1091	1065	1030	1127	1144	1109	1153	1232	1224
B04	643	572	572	581	555	669	660	731	713	731	739	801	977	1021	1003	1127	1127	1118	1056	1144	1136	1197	1259	1329	1338	1259	1338	1479	1400	1408	1435	1215	1391	1452	1444	1479	1356	1488	1338	1505	1426	1593	1470	1470	1452	1364	1391	1373	1532
B05	766	783	766	836	766	871	880	871	889	836	854	968	1083	871	915	1109	1091	968	1074	995	1136	1153	1118	1347	1250	1109	1224	1320	1180	1241	1268	1065	1356	1408	1294	1329	1285	1356	1347	1320	1356	1444	1294	1364	1444	1444	1461	1505	1540
B06	687	660	651	731	792	845	863	810	951	880	889	933	1003	907	1065	1188	1083	1153	1083	1056	1074	1171	1180	1320	1303	1188	1312	1505	1347	1285	1338	1118	1417	1461	1356	1268	1347	1435	1347	1382	1452	1461	1496	1488	1584	1549	1672	1672	1637
B07	572	581	563	555	546	625	581	590	651	660	687	748	792	731	792	827	871	924	942	942	951	1003	1003	1039	1127	1056	1047	1268	1003	1039	1003	1012	1232	1329	1153	1206	1259	1356	1356	1329	1391	1417	1382	1461	1452	1505	1514	1628	1576
B08	819	783	739	810	924	889	889	986	1039	1030	1021	1118	1180	1065	1188	1215	1197	1259	1215	1329	1364	1338	1444	1444	1523	1435	1382	1540	1444	1637	1435	1400	1655	1602	1611	1584	1646	1637	1672	1611	1708	1778	1725	1725	1910	1928	1849	1849	1928
B09	1153	1312	1294	1215	1435	1444	1408	1505	1602	1523	1567	1672	1760	1708	1690	1884	1849	2016	1901	1963	2086	2095	2016	2139	2341	2201	2130	2306	2280	2465	2192	2201	2421	2385	2350	2280	2447	2377	2553	2447	2526	2658	2606	2526	2746	2729	2606	2667	2746
B10	889	1091	1127	1144	1268	1417	1329	1444	1532	1593	1567	1708	1769	1849	1734	1804	1831	1937	1972	1954	2077	2139	2139	2183	2394	2227	2306	2368	2209	2561	2253	2377	2359	2570	2473	2253	2429	2421	2685	2570	2526	2588	2535	2438	2702	2746	2702	2658	2632
B11	634	687	713	651	695	801	775	863	907	898	1003	1127	1118	1162	1153	1294	1144	1285	1347	1373	1496	1584	1602	1602	1655	1523	1549	1611	1664	1813	1743	1787	1989	1875	1813	1787	1822	1901	1981	2051	2042	2033	2051	2069	2209	2289	2262	2280	2306
B12	1065	1003	1065	1056	1136	1224	1109	1215	1259	1285	1329	1294	1461	1452	1461	1408	1408	1602	1699	1611	1752	1769	1769	1972	1989	1778	1813	2060	2016	2139	2060	2069	2165	2139	2095	2016	2201	2174	2165	2148	2148	2236	2315	2174	2333	2473	2438	2394	2597
Mean
Mock	834.25	734.75	752.5	748.25	798.75	842.75	878	915.5	1021	1001.25	1034	1016.75	1175	1181.5	1173	1252.5	1219.25	1289.5	1302.5	1445.75	1395.25	1349	1419.25	1419.5	1463.25	1490	1538	1582.5	1547.25	1604	1567	1478.75	1626.25	1599.75	1575.75	1617.5	1577.75	1677	1617.25	1661.5	1661.25	1782.5	1650.5	1756	1760.25	1665.75	1754	1784.5	1873
RaxX21-Y	711	701.75	679.75	733	757	807.5	803.25	814.25	882.5	851.5	862.75	941.75	1014.5	893.5	990	1084.75	1060.5	1076	1078.5	1080.5	1131.25	1166.25	1186.25	1287.5	1300.75	1197	1241.25	1408.25	1243.5	1300.5	1261	1148.75	1415	1450	1353.5	1346.75	1384.25	1446	1430.5	1410.5	1476.75	1525	1474.25	1509.5	1597.5	1606.5	1624	1663.5	1670.25
RaxX21-sY	935.25	1023.25	1049.75	1016.5	1133.5	1221.5	1155.25	1256.75	1325	1324.75	1366.5	1450.25	1527	1542.75	1509.5	1597.5	1558	1710	1729.75	1725.25	1852.75	1896.75	1881.5	1974	2094.75	1932.25	1949.5	2086.25	2042.25	2244.5	2062	2108.5	2233.5	2242.25	2182.75	2084	2224.75	2218.25	2346	2304	2310.5	2378.75	2376.75	2301.75	2497.5	2559.25	2502	2499.75	2570.25
se
72.3618	64.0799	68.7623	83.9239	115.661	95.3995	124.284	141.663	202.432	214.185	201.555	229.828	264.712	244.946	235.198	241.177	230.457	285.268	285.687	338.717	327.585	292.906	304.868	276.113	309.777	310.175	334.516	328.373	326.807	344.175	317.797	290.292	339.81	307.504	293.912	293.312	313.318	310.705	336.625	315.383	307.114	349.529	310.635	338.294	341.217	310.475	359.844	345.718	361.277	322.474
53.6858	49.6041	46.0134	63.3943	78.3773	61.5	74.2792	83.1789	83.0758	76.1506	68.7367	76.0311	82.5232	68.6215	86.4378	88.811	68.3002	78.6268	55.7562	86.045	86.5846	68.5242	93.4134	87.0062	82.747	83.8401	72.3687	67.1917	96.9472	124.296	92.5644	86.4999	88.7759	57.4674	95.7658	82.9733	89.1809	66.3338	80.5279	68.2184	79.5942	84.8184	93.2509	76.6078	109	109.307	87.368	71.2186	88.2179	86.8757
114.434	129.564	122.222	126.098	158.451	148.479	141.657	145.337	157.76	156.779	133.522	142.745	153.972	151.19	133.049	145.128	171.539	167.694	140.076	143.174	142.043	132.954	120.821	132.065	171.938	170.876	168.004	171.81	137.869	169.832	113.705	124.355	98.0557	150.922	146.24	115.401	145.455	118.643	164.255	122.321	126.286	147.673	125.008	107.759	133.499	109.607	96.8297	96.8197	93.6504	85.3867
[truncated: 100 more columns]

[truncated: 9 more sheets: Fig6 XA21, Fig6 698F, Fig6 786F, Fig6 907F, Fig6 909F, Fig6B, Supp Fig3 left, Supp Fig3 right, Supp Fig4]
